# Supplementary material for: Membrane-anchored HDCR nanowires drive hydrogen-powered CO2 fixation
Source: Springer Nature journal article supplement (doi:10.1038/s41586-022-04971-z), 2022-07-20
Supplement: MOESM1 [file 41586_2022_4971_MOESM1_ESM.pdf]

---

## Supplementary information

---

# Supplementary Information for

## Membrane-anchored HDCR nanowires drive hydrogen-powered CO<sub>2</sub> fixation

Helge M. Dietrich<sup>1†</sup>, Ricardo D. Righetto<sup>2,3†</sup>, Anuj Kumar<sup>1,4</sup>, Wojciech Wietrzynski<sup>2,3</sup>, Raphael Trischler<sup>1</sup>, Sandra K. Schuller<sup>4</sup>, Jonathan Wagner<sup>5</sup>, Fabian M. Schwarz<sup>1</sup>, Benjamin D. Engel<sup>2,3\*</sup>, Volker Müller<sup>1\*</sup>, Jan M. Schuller<sup>4\*</sup>

<sup>1</sup> Molecular Microbiology & Bioenergetics, Institute of Molecular Biosciences, Johann Wolfgang Goethe University; Frankfurt am Main, Germany

<sup>2</sup> Helmholtz Pioneer Campus, Helmholtz Munich; Neuherberg, Germany.

<sup>3</sup> Biozentrum, University of Basel; Basel, Switzerland

<sup>4</sup> CryoEM of Molecular Machines, SYNMIKRO Research Center and Department of Chemistry, Philipps-University, Marburg, Germany

<sup>5</sup> Department of Molecular Structural Biology, Max Planck Institute of Biochemistry; Martinsried, Germany

† Equal contribution

\*Correspondence to: [ben.engel@unibas.ch](mailto:ben.engel@unibas.ch), [vmueller@bio.uni-frankfurt.de](mailto:vmueller@bio.uni-frankfurt.de),

[jan.schuller@synmikro.uni-marburg.de](mailto:jan.schuller@synmikro.uni-marburg.de)

---

## Supplemental Information Table of Contents

|                                                                                                               |              |
|---------------------------------------------------------------------------------------------------------------|--------------|
| <b>Supplementary Information</b>                                                                              | <b>p. 3</b>  |
| <b>Supplementary Methods</b>                                                                                  | <b>p. 4</b>  |
| <b>Supplementary Discussion</b>                                                                               | <b>p. 5</b>  |
| <br>                                                                                                          |              |
| <b>Supplementary Table 1 - Coordination of the [4Fe4S]-clusters in HDCR subunits.</b>                         | <b>p. 6</b>  |
| <br>                                                                                                          |              |
| <b>Supplementary Table 2 - Conserved W- bis-pterin guanine dinucleotide (W-bisPGD) coordinating residues.</b> | <b>p. 7</b>  |
| <br>                                                                                                          |              |
| <b>Supplementary Table 3 - <i>T. kivui</i> HDCR variants used in this study.</b>                              | <b>p. 8</b>  |
| <b>Supplementary Table 4 - Plasmids used in this study.</b>                                                   | <b>p. 9</b>  |
| <b>Supplementary Table 5 - Primers used in this study.</b>                                                    | <b>p. 10</b> |
| <br>                                                                                                          |              |
| <b>Supplementary Figure 1 - Uncropped gel images.</b>                                                         | <b>p. 11</b> |
| <br>                                                                                                          |              |
| <b>Figure legends for Supplementary Videos</b>                                                                | <b>p. 12</b> |
| <br>                                                                                                          |              |
| <b>Supplementary References</b>                                                                               | <b>p. 12</b> |

## Supplementary Information:

### Interaction studies of HDCR subunits

Genetic complementation of the  $\Delta hdcr$  strain was used to probe the connectivity of the HDCR complex. When HycB4 was omitted from the overexpression (HDCR\_ΔHycB4), only HydA2 was found in the eluate after purification with HydA2-His<sub>6</sub> (Fig. 2C). However, addition of a second His<sub>6</sub>-tag to the HDCR\_ΔHycB4 construct (HydA2-His<sub>6</sub> & His<sub>6</sub>-FdhF) led to copurification of monomeric FdhF and the protein pair HycB3-HydA2, although there was no functional interaction between FdhF and HycB3-HydA2. This verifies HycB4 as the connecting subunit between HydA2 and the protein pair of FdhF and HycB3. When HycB3 was omitted from the overexpression (HDCRΔHycB3), HydA2-His<sub>6</sub> purification yielded a complex containing HydA2 and HycB4, but not FdhF. This proves that HycB3 is the subunit linking HycB4 to FdhF, revealing the chain of protein interactions to be FdhF-HycB3-HycB4-HydA2. This conclusion is in complete accordance with the cryo-EM structure (Fig. 1) and is also supported by the genetic organization of the *hdcr* operon, where the genes for the enzyme complex are arranged in the same order<sup>1</sup>.

### Catalytic centers operate independently, but HycB3 is vital for FdhF activity

Hydrogenase activity was independent of HycB3 and HycB4. When HydA2 was omitted from overexpression (HDCR\_ΔHydA2) or the H-cluster coordinating Cys387 was substituted with alanine (HDCR\_HydA2 C387A), there was no hydrogenase activity (Extended Data Fig. 7F). Formate dehydrogenase activity was marginally affected by removal of HycB4 and HydA2, but HycB3 was required for FdhF activity (Extended Data Fig. 7F).

---

**Supplementary Methods 1: Additional methods for Extended Data Fig. 7.**

For methylviologen-dependent hydrogenase activity,  $1.1 \times 10^5$  Pa  $H_2$  was used as electron donor. For methylviologen-dependent formate dehydrogenase assay and analysis of hydrogen production from formate, 150 mM formate was used as electron donor. Formate production from  $H_2 + CO_2$  was determined with a substrate gas composition of  $H_2 + CO_2$  (80:20 [v:v],  $1.1 \times 10^5$  Pa). The reaction buffer for pH-optima analysis (Extended Data Fig. 7a,b) composed of 50 mM MES, 50 mM MOPS, 50 mM HEPES, 50 mM EPPS, 50 mM CHES, 20 mM  $MgSO_4$ , 4  $\mu$ M Resazurin, 2 mM DTE, pH as indicated. The reaction buffer for Extended Data Fig. 7c-h was 100 mM HEPES, 20 mM  $MgSO_4$ , 4  $\mu$ M Resazurin, 2 mM DTE, pH 7.0.

## Supplementary Discussion

### Relevance of HDCR filamentation to its activity in different organisms

To date, there are two organisms identified to produce an HDCR, *T. kivui* and the closely related *Acetobacterium woodii*, and characterization of these enzymes showed that both HDCRs form large filaments<sup>2,3</sup>. In previous studies, filamentation of *A. woodii* HDCR was reported to be dependent on the presence of divalent cations, and in accordance with our findings, the filamentous form was the most active state of the enzyme<sup>4</sup>. While similar experiments with the *T. kivui* HDCR did not show a divalent cation dependency on filamentation, it must be noted that the shortened protomers reported in the study of Schuchmann *et al.*<sup>4</sup> showed an elution profile corresponding to a molecular mass of about 3500 kDa. This indicates the reported enzyme still forms roughly a 14-mer (assuming the *A. woodii* HDCR forms hexamers as in *T. kivui*) or a 20-mer (tetrameric form of the HDCR) and makes comparison of the depolymerized states of the two enzymes difficult. However, *A. woodii* HDCR in the 3500 kDa state showed a ~30 % reduction in activity compared to a similarly treated control of the filamentous form (>5000 kDa), and therefore, is consistent with our findings of a stepwise reduction in HDCR activity, depending on the number of connected active centers.

**Supplementary Table 1. Coordination of the [4Fe4S]-clusters in HDCR subunits.**

Cys, cysteine; HC, hydrogen cluster.

| <b>Subunit</b> | <b>[4Fe4S] -Number</b> | <b>Coordinating amino acids</b> |
|----------------|------------------------|---------------------------------|
| <b>FdhF</b>    | [4Fe4S] I              | Cys13, Cys16, Cys20, Cys48      |
| <b>HycB3</b>   | [4Fe4S] I              | Cys13, Cys16, Cys19, Cys150     |
|                | [4Fe4S] II             | Cys23, Cys134, Cys137, Cys146   |
|                | [4Fe4S] III            | Cys52, Cys55, Cys61, Cys93      |
|                | [4Fe4S] IV             | Cys64, Cys83, Cys86, Cys89      |
| <b>HycB4</b>   | [4Fe4S] I              | Cys34, Cys37, Cys40, Cys180     |
|                | [4Fe4S] II             | Cys44, Cys165, Cys168, Cys176   |
|                | [4Fe4S] III            | Cys83, Cys86, Cys91, Cys124     |
|                | [4Fe4S] IV             | Cys95, Cys114, Cys117, Cys120   |
| <b>HydA2</b>   | [4Fe4S] I              | Cys15, Cys18, Cys21, Cys55      |
|                | [4Fe4S] II             | Cys25, Cys45, Cys48, Cys51      |
|                | [4Fe4S] (HC)           | Cys184, Cys239, Cys383, Cys387  |

**Supplementary Table 2. Conserved W- bis-pterin guanine dinucleotide (W-bisPGD) coordinating residues.** Amino acids interacting with the W-bisPGD cofactor in the closest-related formate dehydrogenase (DgW-FDH from *Desulfovibrio gigas*, PDB: 1H0H) are mostly conserved in *T. kivui* FdhF. \*, conserved amino acid.

| W-bisPGD coordinating amino acid in DgW-FDH | Related amino acid in <i>T. kivui</i> FdhF |
|---------------------------------------------|--------------------------------------------|
| <b>C20</b>                                  | C16 *                                      |
| <b>C54</b>                                  | C48 *                                      |
| <b>K56</b>                                  | K50 *                                      |
| <b>Q154</b>                                 | C135                                       |
| <b>CSe158</b>                               | C139 (*)                                   |
| <b>E197</b>                                 | E179 *                                     |
| <b>N198</b>                                 | C180                                       |
| <b>N194</b>                                 | N176 *                                     |
| <b>D220</b>                                 | D202 *                                     |
| <b>R222</b>                                 | R204 *                                     |
| <b>G239</b>                                 | G221 *                                     |
| <b>D241</b>                                 | N223                                       |
| <b>M371</b>                                 | M297 *                                     |
| <b>W373</b>                                 | V299                                       |
| <b>N518</b>                                 | N403 *                                     |
| <b>Q517</b>                                 | E402                                       |
| <b>S522</b>                                 | S407 *                                     |
| <b>V542</b>                                 | Q427                                       |
| <b>N543</b>                                 | D428                                       |
| <b>K578</b>                                 | K450 *                                     |
| <b>D605</b>                                 | missing                                    |
| <b>T854</b>                                 | T600 *                                     |
| <b>R856</b>                                 | R602 *                                     |
| <b>V857</b>                                 | R603                                       |
| <b>T858</b>                                 | V604                                       |
| <b>H860</b>                                 | H606 *                                     |
| <b>Q862</b>                                 | H608                                       |
| <b>T863</b>                                 | T609 *                                     |
| <b>N951</b>                                 | N682 *                                     |



K968

K699 \*

**Supplementary Table 3. *T. kivui* HDCR variants used in this study.**

Cys, cysteine; Ala, alanine.

| Strain                                            | Genotype                                                                                                    | His <sub>6</sub> -tag location                  | Reference        |
|---------------------------------------------------|-------------------------------------------------------------------------------------------------------------|-------------------------------------------------|------------------|
| <i>Δhdcr</i>                                      | <i>hdcr</i> operon deleted                                                                                  | none                                            | ( <sup>5</sup> ) |
| <b>HDCR_His</b>                                   | <i>Δhdcr</i> strain + HDCR operon                                                                           | <i>hydA2</i> C-term.                            | This study       |
| <b>HDCRΔHydA2</b>                                 | <i>Δhdcr</i> strain + HDCR operon without <i>hydA2</i> gene                                                 | <i>fdhF</i> N-term.                             | This study       |
| <b>HDCRΔHycB4</b>                                 | <i>Δhdcr</i> strain + HDCR operon without <i>hycB4</i> gene                                                 | <i>hydA2</i> C-term.                            | This study       |
| <b>HDCRΔHycB3</b>                                 | <i>Δhdcr</i> strain + HDCR operon without <i>hycB3</i> gene                                                 | <i>hydA2</i> C-term.                            | This study       |
| <b>HDCRΔHycB3<br/>ΔHycB4</b>                      | <i>Δhdcr</i> strain + HDCR operon without <i>hycB3</i> and <i>hycB4</i> genes                               | <i>hydA2</i> C-term.                            | This study       |
| <b>HDCRΔHycB4,<br/>His@Hyd &amp;<br/>His@FdhF</b> | <i>Δhdcr</i> strain + HDCR operon without <i>hycB4</i> gene                                                 | <i>hydA2</i> C-term.<br>and <i>fdhF</i> N-term. | This study       |
| <b>HDCR_HydA2<br/>C387A</b>                       | <i>Δhdcr</i> strain + HDCR operon, <i>hydA2_Cys387</i> substituted with Ala                                 | <i>hydA2</i> C-term.                            | This study       |
| <b>HDCR_HycB4<br/>Δ[4Fe4S] IV</b>                 | <i>Δhdcr</i> strain + HDCR operon, <i>hycB4_Cys114</i> , <i>Cys117</i> , <i>Cys120</i> substituted with Ala | <i>hydA2</i> C-term.                            | This study       |
| <b>HDCR_HycB3ΔC</b>                               | <i>Δhdcr</i> strain + HDCR operon, deletion of <i>hycB3</i> amino acids 160-184                             | <i>hydA2</i> C-term.                            | This study       |
| <b>HDCR_HycB4ΔC</b>                               | <i>Δhdcr</i> strain + HDCR operon, deletion of <i>hycB4</i> amino acids 190-210                             | <i>hydA2</i> C-term.                            | This study       |

**Supplementary Table 4. Plasmids used in this study.** The plasmids used in this study were either used for PCR (20 ng per 25  $\mu$ l reaction) or for transformation of *T. kivui* (1 mg). C, cysteine; A, alanine; aa, amino acids.

| Plasmid | Purpose                                                                                                                          | Reference        |
|---------|----------------------------------------------------------------------------------------------------------------------------------|------------------|
| pMU131  | Shuttle vector                                                                                                                   | ( <sup>6</sup> ) |
| pPB5    | Cloning vector for HDCR operon with S-layer promoter                                                                             | ( <sup>7</sup> ) |
| pHD001  | Overproduction of His <sub>6</sub> -tagged HDCR                                                                                  | This study       |
| pHD015  | Overproduction of His <sub>6</sub> -tagged HDCR $\Delta$ HydA2                                                                   | This study       |
| pHD020  | Overproduction of His <sub>6</sub> -tagged HDCR $\Delta$ HycB3                                                                   | This study       |
| pHD024  | Overproduction of His <sub>6</sub> -tagged HDCR $\Delta$ HycB4, His <sub>6</sub> -tag at FdhF and His <sub>6</sub> -tag at HydA2 | This study       |
| pHD026  | Overproduction of His <sub>6</sub> -tagged HDCR, HydA2 C387A                                                                     | This study       |
| pHD028  | Overproduction of His <sub>6</sub> -tagged HDCR, HycB4 C114A, C117A, C120A                                                       | This study       |
| pLR002  | Plasmid containing HDCR without HydA2, His <sub>6</sub> at <i>hycB4</i>                                                          | This study       |
| pLR002c | Plasmid containing HDCR without HydA2, His <sub>6</sub> at <i>hycB4</i> and <i>fdhF</i>                                          | This study       |
| pLR003b | Overproduction of His <sub>6</sub> -tagged HDCR $\Delta$ HycB4                                                                   | This study       |
| pLR004  | Overproduction of His <sub>6</sub> -tagged HDCR $\Delta$ HycB3 $\Delta$ HycB4                                                    | This study       |
| pRT8    | Overproduction of His <sub>6</sub> -tagged HDCR, HycB3 $\Delta$ aa160-184                                                        | This study       |
| pRT9    | Overproduction of His <sub>6</sub> -tagged HDCR, HycB4 $\Delta$ aa190-210                                                        | This study       |

**Supplementary Table 5. Primers used in this study.**

| Primer | Sequence (5'-3')                                     |
|--------|------------------------------------------------------|
| P1     | GTGTAATTTTTTATACAAATAATTTCAATTCG                     |
| P2     | CCTGTTTACCATCTTTCATACAGTCAATCCTCCTCC                 |
| P3     | GAGGAGGATTGACTGTATGAAAGATGGTAAACAGGAAAAG             |
| P4     | GATTTTTAATGGTGATGGTGATGGTGTACTTTTTTCTCGGTGTATATTTAG  |
| P5     | AGTACACCATCACCATCACCATTAATAAATCAAAAATTTTGTGGTAGTG    |
| P6     | GGGTTTATCGACCTGCAGC                                  |
| P11    | ATCCTCTAGAGTCGACCTG                                  |
| P12    | GGTACCGAGCTCGAATTG                                   |
| P39    | TAAGAGTGGTAAGATAAAAATCAAAAATTTTGTGGTAGTG             |
| P40    | ATTTTTGATTTTTATCTTACCACTCTTAAAAAACTC                 |
| P47    | GGGAGGAAAATGAATGATTTTTGCTAATATTTCTATCTATTTGAG        |
| P48    | AATATTAGCAAAAATCATTCATTTTCTCCCTTTTCCTTTGC            |
| P55    | TCCAGAAGGAGCAATAAGCGGTGGTG                           |
| P56    | CAAGTCATCACTTCAACG                                   |
| P57    | TAAGAGTGCTTTATTGGCATGTCCATTTG                        |
| P58    | GCGCCTATTGCCAACTTTTCATCTACTACG                       |
| PLR3   | GTAAGACACCATCACCATCACCATTAATAAATCAAAAATTTTGTGGTAG    |
| PLR4   | TGATTTTTAATGGTGATGGTGATGGTGTCTTACCACTCTTAAAAAACTC    |
| PLR7   | TCTATCTATTTGAGATTTTCATGTCTGCAAATAAAGCTA              |
| PLR8   | TTATTTGCAGACATGAAAATCTCAAATAGATAGAAATATTAGC          |
| PLR11b | GTATGCACCATCACCATCACCATAAAGATGGTAAACAGGAAAAGGTT      |
| PLR12b | CTTTATGGTGATGGTGATGGTGCATACAGTCAATCCTCCTCCTTGTA      |
| PLR15  | AAAGGGAGGAAAATGATTTATTAATTAATAATATTGAAAAGAAAGGGATGTG |
| PLR16  | ATATTATTAATTAATAAATCATTTCCTCCCTTTTCCTTTG             |
| PRT7   | TAATGATTTTTGCTAATATTTCTATCTATTTGAG                   |
| PRT8   | ACCATCAACCAATTTCAAAGCC                               |
| PRT9   | TAATTTATTAATTAATAAATATTGAAAAGAAAGGGATG               |
| PRT10  | CATAACCAAAGTCAACGCATTTTC                             |
| Pseq5  | GAATCTTCAAATTCAGGCAATAAGC                            |
| Pseq6  | TAGCCGACCAAGAATGAAC                                  |
| Pseq7  | TTCAGCCAAATAGCCGAGAG                                 |
| Pseq8  | AGTAGCGGCTGCTAAAGTTG                                 |
| Pseq9  | AGGTGCGACGGTTGGTACTG                                 |
| Pseq10 | GCTCCGGCTATTAGAGTTTC                                 |
| Pseq11 | ATGTATAAGCGGTGGTGGAC                                 |
| Pseq12 | GCGTTATGCCTACCTATATCTTC                              |
| Pseq13 | TTCCGGAGAAGGCGCTACA                                  |

Figure 2c

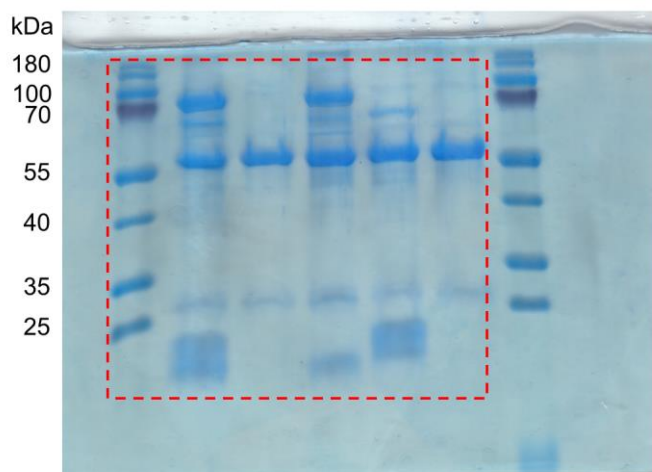

Figure 3d

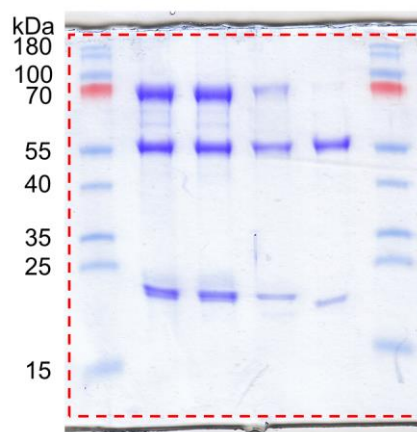

Extended Data Figure 6a

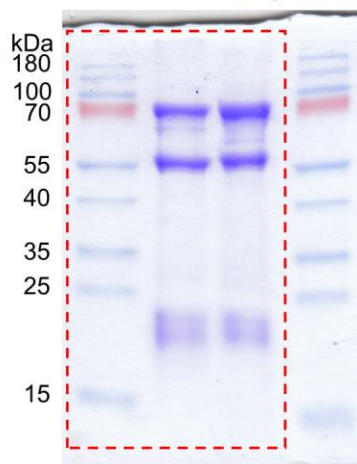

Supplementary Figure 1. Uncropped gel images.

**Supplementary Video 1. Overall presentation of the segmented HDCR cryo-EM density and corresponding atomic model.**

Colors are used as in Fig. 1.

**Supplementary Video 2. *In situ* visualization of bundled HDCR filaments inside a *T. kivui* cell.**

Sequential slices back and forth through the cryo-ET volume, followed by reveal and tour of the cellular segmentation. Segmentation colored as described in Fig. 5.

**Supplementary References:**

- 1 Hess, V., Poehlein, A., Weghoff, M. C., Daniel, R. & Müller, V. A genome-guided analysis of energy conservation in the thermophilic, cytochrome-free acetogenic bacterium *Thermoanaerobacter kivui*. *BMC Genomics* **15**, 1139 (2014).
- 2 Schuchmann, K. & Müller, V. Direct and reversible hydrogenation of CO<sub>2</sub> to formate by a bacterial carbon dioxide reductase. *Science* **342**, 1382-1385 (2013).
- 3 Schwarz, F. M., Schuchmann, K. & Müller, V. Hydrogenation of CO<sub>2</sub> at ambient pressure catalyzed by a highly active thermostable biocatalyst. *Biotechnol. Biofuels* **11**, 237 (2018).
- 4 Schuchmann, K., Vonck, J. & Müller, V. A bacterial hydrogen-dependent CO<sub>2</sub> reductase forms filamentous structures. *FEBS J.* **283**, 1311-1322 (2016).
- 5 Jain, S., Dietrich, H. M., Müller, V. & Basen, M. Formate is Required for Growth of the Thermophilic Acetogenic Bacterium *Thermoanaerobacter kivui* Lacking Hydrogen-Dependent Carbon Dioxide Reductase (HDCR). *Front. Microbiol.* **11**, 59 (2020).
- 6 Shaw, A. J., Hogsett, D. A. & Lynd, L. R. Natural Competence in *Thermoanaerobacter* and *Thermoanaerobacterium* Species. *Appl. Environ. Microbiol.* **76**, 4713-4719 (2010).
- 7 Benner, P. *Proteinproduktion in thermophilen, acetogenen Bakterium Thermoanaerobacter kivui*. Bachelor thesis, Goethe University Frankfurt am Main, (2016).
