# Supplementary material for: Membrane-anchored HDCR nanowires drive hydrogen-powered CO2 fixation
Source: Springer Nature journal article supplement (doi:10.1038/s41586-022-04971-z), 2022-07-20
Supplement: MOESM6 [file 41586_2022_4971_MOESM6_ESM.xlsx]

## Sheet: Fig. 2d
H2 - and formate production rates for different purified HDCR variants missing specific HDCR subunits compared to the complete HDCR_His protein. Enzymatic activity was calculated from n=9 measurements (3 biological replicates with 3 technical replicates, respectively).
		H2 production from formate [%]								Formate production from H2 [%]
Biological Replicate ↓	Technical Replicate ↓	HDCR_His	HDCR∆HycB4	HDCR∆HycB3	HDCR∆HydA2			Biological Replicate ↓	Technical Replicate ↓	HDCR_His	HDCR∆HycB4	HDCR∆HycB3	HDCR∆HydA2
1	1	89.7706	0.0133369	0.0533476	0.0666845			1	1	114.39	7.64	4.64	0
	2	82.1152	0	0	0				2	113.35	3.82	0	2.05
	3	84.6359	0	0.0133369	0.0800213				3	88.71	1.65	0	1.16
2	1	81.2883	0.440117	0.0133369	0.0133369			2	1	107.15	3.31	2.27	3.06
	2	101.56	0.0400107	0.0533476	0				2	103.68	3.18	1.12	2.07
	3	83.5423	0.0266738	0.0400107	0				3	119.88	0	6.61	0
3	1	73.1528	0.0800213	0.0666845	0.0133369			3	1	80.94	4.88	0.5	3.02
	2	140.851	0.0400107	0.0133369	0				2	85.08	0.83	1.24	0.41
	3	163.083	0.0400107	0.0400107	0				3	86.81	0	0	0
	Average	100	0.0755757	0.0326013	0.0192644				Average	99.9989	2.81222	1.82	1.30778
		Mean value for HDCR_His from n=9 values was calculated and set to 100 % relative activity, respectively. Relative activities of other Samples have been calculated accordingly. Raw data of catalytic activities used for calculating relative activities are displayed below.
		H2 production from formate [µmol min-1 mg-1]								Formate production from H2 [µmol min-1 mg-1]
Biological Replicate ↓	Technical Replicate ↓	HDCR_His	HDCR∆HycB4	HDCR∆HycB3	HDCR∆HydA2			Biological Replicate ↓	Technical Replicate ↓	HDCR_His	HDCR∆HycB4	HDCR∆HycB3	HDCR∆HydA2
1	1	67.31	0.01	0.04	0.05			1	1	27.67	1.848	1.122	0
	2	61.57	0	0	0				2	27.42	0.924	0	0.495
	3	63.46	0	0.01	0				3	21.46	0.4	0	0.28
2	1	60.95	0.33	0.01	0.06			2	1	25.92	0.8	0.55	0.74
	2	76.15	0.03	0.04	0.01				2	25.08	0.77	0.27	0.5
	3	62.64	0.02	0.03	0				3	29	0	1.6	0
3	1	54.85	0.06	0.05	0			3	1	19.58	1.18	0.12	0.73
	2	105.61	0.03	0.01	0.01				2	20.58	0.2	0.3	0.1
	3	122.28	0.03	0.03	0				3	21	0	0	0
	Average	74.98	0.0566667	0.0244444	0.0144444				Average	24.19	0.680222	0.440222	0.316111
