# Supplementary material for: Membrane-anchored HDCR nanowires drive hydrogen-powered CO2 fixation
Source: Springer Nature journal article supplement (doi:10.1038/s41586-022-04971-z), 2022-07-20
Supplement: MOESM7 [file 41586_2022_4971_MOESM7_ESM.xlsx]

## Sheet: Fig. 3b
Culture growth of T. kivui WT and different HDCR variant strainswas monitored photometrically at 600 nm. Experiments were performed in n=3 biological replicates
	WT			HDCR_His			HDCR_HycB4∆[4Fe4S] IV			∆HDCR			HDCR_HycB3∆C-Term
Biological Replicate →	1	2	3	1	2	3	1	2	3	1	2	3	1	2	3
Hours ↓
0	0.151	0.141	0.145	0.126	0.112	0.113	0.115	0.095	0.093	0.094	0.08	0.105	0.118	0.115	0.111
1	0.195	0.213	0.214	0.191	0.192	0.182	0.126	0.122	0.121	0.105	0.094	0.118	0.146	0.128	0.132
2	0.267	0.29	0.306	0.273	0.266	0.247	0.154	0.129	0.13	0.118	0.118	0.132	0.216	0.146	0.146
3	0.375	0.388	0.404	0.388	0.394	0.37	0.175	0.204	0.161	0.143	0.133	0.146	0.251	0.163	0.214
4	0.535	0.566	0.559	0.528	0.507	0.511	0.244	0.206	0.189	0.141	0.137	0.161	0.276	0.177	0.342
5	0.89	0.9	0.93	0.84	0.81	0.77	0.307	0.275	0.243				0.335	0.215	0.255
6	1.26	1.37	1.38	1.1	1.12	1.03	0.366	0.342	0.301	0.15	0.13	0.168	0.266	0.266	0.273
7	1.87	1.99	2.02	1.46	1.52	1.43	0.434	0.402	0.333				0.594	0.314	0.555
8	2.25	2.39	2.49	1.82	1.86	1.78	0.49	0.426	0.305	0.161	0.15	0.174	0.56	0.375	0.571
9	2.56	2.76	2.92	2.3	2.16	1.92	0.522	0.483	0.385				0.725	0.756	0.562
10	2.93	3.02	2.87	2.55	2.57	2.45	0.579	0.551	0.44	0.174	0.147	0.17	1.2	1.09	1.09
11	2.77	2.83	2.69	2.71	2.74	2.65	0.81	0.775	0.759				1.46	1.41	1.39
12	2.45	2.64	2.57	2.82	2.79	2.75	1.32	1.27	1.28	0.158	0.147	0.182	1.67	1.6	1.56
13				2.62	2.53	2.74	1.51	1.49	1.38				1.88	1.7	1.72
14	2.2	2.39	2.43	2.4	2.44	2.56	1.69	1.64	1.63	0.186	0.162	0.205	2.18	2.12	1.85
15							1.76	1.74	1.73				1.99	1.93	1.85
16	2.27	2.33	2.3	2.34	2.32	2.37	1.96	2.14	2.19	0.197	0.177	0.216	2.37	2.13	2.23
17							2.02	2.06	2.09				2.74	2.43	2.14
18							2.14	2.23	2.29	0.182	0.157	0.198	2.62	2.4	2.32
19
20							2.45	2.4	2.58	0.166	0.155	0.175	2.53	2.24	2.41
21	2.12	2.15	2.19	2.05	2.14	2.18
22							2.52	2.18	2.05				2.11	2.09	2.11
23	2.06	2.07	2.07	2.07	1.99	2.01				0.199	0.18	0.199
25	1.96	2.04	2.04	2.07	1.97	2.02				0.183	0.158	0.187
26													2.08	1.79	1.95
30							2.03	1.92	1.89	0.16	0.143	0.174
35	1.79	1.84	1.83	1.66	1.69	1.76	1.76	1.76	1.81				1.99	1.78	1.67

## Sheet: Fig. 3c
Size exclusion data of different purified HDCR variants. Superose 6 Increase 10/300 GL column was used and data was analyzed using UNICORN 5.31 software.
		HDCR_His			HDCR_HycB4∆[4Fe4S] IV			∆HDCR			HDCR_HycB3∆C-Term
		Elution volume [ml]	mAU		Elution volume [ml]	mAU		Elution volume [ml]	mAU		Elution volume [ml]	mAU
		0	9.47		0	8.78		0	10.29		0	9.792
		0.04	9.46		0.03	8.79		0.03	10.29		0.03	9.784
		0.07	9.45		0.06	8.78		0.06	10.3		0.06	9.797
		0.11	9.44		0.09	8.77		0.09	10.3		0.09	9.768
		0.14	9.45		0.13	8.77		0.13	10.31		0.12	9.77
		0.18	9.45		0.16	8.78		0.16	10.32		0.15	9.765
		0.22	9.46		0.19	8.78		0.19	10.38		0.18	9.764
		0.25	9.45		0.22	8.77		0.22	10.37		0.21	9.76
		0.29	9.5		0.25	8.75		0.25	10.37		0.24	9.752
		0.32	9.68		0.28	8.76		0.28	10.37		0.27	9.736
		0.36	9.59		0.31	8.77		0.32	10.37		0.3	9.754
		0.4	9.57		0.34	8.85		0.35	10.37		0.33	9.735
		0.43	9.51		0.38	9.14		0.38	10.39		0.36	9.741
		0.47	9.51		0.41	9.06		0.41	10.38		0.39	9.743
		0.5	9.5		0.44	9		0.44	10.38		0.42	9.736
		0.54	9.5		0.47	8.93		0.47	10.38		0.45	9.749
		0.58	9.49		0.5	8.89		0.51	10.38		0.48	9.743
		0.61	9.49		0.53	8.85		0.54	10.4		0.51	9.747
		0.65	9.48		0.56	8.82		0.57	10.4		0.54	9.741
		0.68	9.47		0.6	8.8		0.6	10.41		0.569	9.738
		0.72	9.46		0.63	8.78		0.63	10.42		0.599	9.743
		0.76	9.47		0.66	8.77		0.66	10.43		0.629	9.732
		0.79	9.47		0.69	8.77		0.69	10.43		0.659	9.727
		0.83	9.48		0.72	8.75		0.73	10.45		0.689	9.737
		0.86	9.47		0.75	8.74		0.76	10.45		0.719	9.733
		0.9	9.47		0.78	8.73		0.79	10.46		0.749	9.739
		0.94	9.47		0.81	8.72		0.82	10.46		0.779	9.724
		0.97	9.48		0.85	8.7		0.85	10.48		0.809	9.728
		1.01	9.48		0.88	8.69		0.88	10.49		0.839	9.732
		1.04	9.48		0.91	8.71		0.92	10.48		0.869	9.729
		1.08	9.47		0.94	8.69		0.95	10.51		0.899	9.731
		1.12	9.48		0.97	8.68		0.98	10.51		0.929	9.741
		1.15	9.47		1	8.7		1.01	10.52		0.959	9.733
		1.19	9.5		1.03	8.67		1.04	10.52		0.989	9.735
		1.22	9.49		1.07	8.67		1.07	10.52		1.019	9.74
		1.26	9.48		1.1	8.68		1.11	10.53		1.049	9.745
		1.29	9.49		1.13	8.68		1.14	10.54		1.079	9.732
		1.33	9.49		1.16	8.67		1.17	10.55		1.109	9.742
		1.37	9.5		1.19	8.67		1.2	10.55		1.139	9.752
		1.4	9.51		1.22	8.67		1.23	10.57		1.169	9.74
		1.44	9.51		1.25	8.68		1.26	10.58		1.199	9.761
		1.47	9.51		1.28	8.69		1.3	10.58		1.229	9.766
		1.51	9.52		1.32	8.68		1.33	10.59		1.259	9.762
		1.55	9.5		1.35	8.69		1.36	10.58		1.289	9.764
		1.58	9.51		1.38	8.7		1.39	10.6		1.319	9.761
		1.62	9.5		1.41	8.68		1.42	10.6		1.349	9.782
		1.65	9.5		1.44	8.7		1.45	10.6		1.379	9.763
		1.69	9.52		1.47	8.67		1.48	10.6		1.409	9.778
		1.73	9.51		1.5	8.7		1.52	10.62		1.439	9.777
		1.76	9.52		1.54	8.7		1.55	10.64		1.469	9.791
		1.8	9.51		1.57	8.69		1.58	10.65		1.499	9.771
		1.83	9.5		1.6	8.76		1.61	10.64		1.529	9.784
		1.87	9.51		1.63	8.73		1.64	10.63		1.559	9.782
		1.91	9.51		1.66	8.72		1.67	10.66		1.589	9.779
		1.94	9.5		1.69	8.69		1.71	10.66		1.619	9.773
		1.98	9.5		1.72	8.69		1.74	10.66		1.648	9.791
		2.01	9.51		1.75	8.69		1.77	10.67		1.678	9.772
		2.05	9.51		1.79	8.7		1.8	10.67		1.708	9.791
		2.09	9.5		1.82	8.69		1.83	10.69		1.738	9.786
		2.12	9.5		1.85	8.68		1.86	10.69		1.768	9.797
		2.16	9.52		1.88	8.68		1.9	10.69		1.798	9.809
		2.19	9.49		1.91	8.7		1.93	10.69		1.828	9.802
		2.23	9.49		1.94	8.7		1.96	10.71		1.858	9.818
		2.27	9.49		1.97	8.68		1.99	10.71		1.888	9.799
		2.3	9.47		2.01	8.68		2.02	10.71		1.918	9.801
		2.34	9.48		2.04	8.68		2.05	10.71		1.948	9.803
		2.37	9.47		2.07	8.69		2.08	10.73		1.978	9.83
		2.41	9.48		2.1	8.69		2.12	10.73		2.008	9.826
		2.45	9.47		2.13	8.69		2.15	10.74		2.038	9.832
		2.48	9.47		2.16	8.69		2.18	10.74		2.068	9.831
		2.52	9.45		2.19	8.69		2.21	10.75		2.098	9.844
		2.55	9.46		2.22	8.7		2.24	10.75		2.128	9.84
		2.59	9.46		2.26	8.69		2.27	10.74		2.158	9.855
		2.63	9.46		2.29	8.69		2.31	10.76		2.188	9.849
		2.66	9.46		2.32	8.7		2.34	10.77		2.218	9.847
		2.7	9.45		2.35	8.7		2.37	10.77		2.248	9.875
		2.73	9.46		2.38	8.69		2.4	10.77		2.278	9.87
		2.77	9.45		2.41	8.68		2.43	10.78		2.308	9.867
		2.81	9.46		2.44	8.67		2.46	10.78		2.338	9.907
		2.84	9.46		2.48	8.67		2.5	10.77		2.368	9.892
		2.88	9.45		2.51	8.65		2.53	10.79		2.398	9.882
		2.91	9.47		2.54	8.64		2.56	10.79		2.428	9.882
		2.95	9.46		2.57	8.62		2.59	10.78		2.458	9.901
		2.99	9.45		2.6	8.6		2.62	10.79		2.488	9.898
		3.02	9.47		2.63	8.56		2.65	10.79		2.518	9.913
		3.06	9.45		2.66	8.54		2.69	10.81		2.548	9.916
		3.09	9.45		2.69	8.52		2.72	10.82		2.578	9.903
		3.13	9.45		2.73	8.51		2.75	10.8		2.608	9.922
		3.17	9.44		2.76	8.46		2.78	10.81		2.638	9.922
		3.2	9.47		2.79	8.43		2.81	10.81		2.668	9.915
		3.24	9.45		2.82	8.41		2.84	10.81		2.698	9.912
		3.27	9.47		2.85	8.37		2.87	10.82		2.727	9.925
		3.31	9.48		2.88	8.35		2.91	10.83		2.757	9.918
		3.35	9.45		2.91	8.32		2.94	10.84		2.787	9.919
		3.38	9.45		2.95	8.29		2.97	10.85		2.817	9.93
		3.42	9.47		2.98	8.26		3	10.85		2.847	9.936
		3.45	9.46		3.01	8.24		3.03	10.84		2.877	9.933
		3.49	9.46		3.04	8.2		3.06	10.83		2.907	9.924
		3.53	9.46		3.07	8.17		3.1	10.84		2.937	9.934
		3.56	9.47		3.1	8.18		3.13	10.86		2.967	9.948
		3.6	9.45		3.13	8.13		3.16	10.86		2.997	9.95
		3.63	9.47		3.17	8.12		3.19	10.86		3.027	9.962
		3.67	9.46		3.2	8.11		3.22	10.86		3.057	9.955
		3.71	9.47		3.23	8.11		3.25	10.88		3.087	9.957
		3.74	9.48		3.26	8.11		3.29	10.87		3.117	9.961
		3.78	9.47		3.29	8.09		3.32	10.89		3.147	9.959
		3.81	9.48		3.32	8.08		3.35	10.87		3.177	9.971
		3.85	9.48		3.35	8.09		3.38	10.87		3.207	9.983
		3.88	9.48		3.38	8.09		3.41	10.87		3.237	9.975
		3.92	9.49		3.42	8.09		3.44	10.87		3.267	9.999
		3.96	9.5		3.45	8.09		3.47	10.88		3.297	10.015
		3.99	9.48		3.48	8.09		3.51	10.88		3.327	10.015
		4.03	9.5		3.51	8.11		3.54	10.89		3.357	10.025
		4.06	9.5		3.54	8.12		3.57	10.89		3.387	10.024
		4.1	9.48		3.57	8.13		3.6	10.89		3.417	10.028
		4.14	9.49		3.6	8.13		3.63	10.9		3.447	10.033
		4.17	9.49		3.64	8.14		3.66	10.91		3.477	10.049
		4.21	9.49		3.67	8.14		3.7	10.89		3.507	10.054
		4.24	9.49		3.7	8.16		3.73	10.9		3.537	10.058
		4.28	9.5		3.73	8.16		3.76	10.91		3.567	10.065
		4.32	9.49		3.76	8.17		3.79	10.91		3.597	10.059
		4.35	9.5		3.79	8.2		3.82	10.91		3.627	10.08
		4.39	9.5		3.82	8.2		3.85	10.92		3.657	10.078
		4.42	9.5		3.85	8.22		3.89	10.91		3.687	10.075
		4.46	9.49		3.89	8.24		3.92	10.92		3.717	10.109
		4.5	9.51		3.92	8.26		3.95	10.92		3.747	10.097
		4.53	9.5		3.95	8.27		3.98	10.91		3.777	10.096
		4.57	9.48		3.98	8.27		4.01	10.93		3.806	10.094
		4.6	9.5		4.01	8.29		4.04	10.94		3.836	10.095
		4.64	9.49		4.04	8.31		4.08	10.93		3.866	10.103
		4.68	9.5		4.07	8.34		4.11	10.93		3.896	10.101
		4.71	9.5		4.11	8.35		4.14	10.94		3.926	10.127
		4.75	9.49		4.14	8.36		4.17	10.95		3.956	10.114
		4.78	9.49		4.17	8.38		4.2	10.94		3.986	10.109
		4.82	9.49		4.2	8.4		4.23	10.95		4.016	10.111
		4.86	9.5		4.23	8.4		4.26	10.95		4.046	10.126
		4.89	9.51		4.26	8.42		4.3	10.94		4.076	10.114
		4.93	9.51		4.29	8.44		4.33	10.96		4.106	10.11
		4.96	9.5		4.32	8.43		4.36	10.96		4.136	10.113
		5	9.5		4.36	8.45		4.39	10.97		4.166	10.121
		5.04	9.51		4.39	8.46		4.42	10.97		4.196	10.129
		5.07	9.51		4.42	8.47		4.45	10.96		4.226	10.126
		5.11	9.5		4.45	8.48		4.49	10.97		4.256	10.115
		5.14	9.52		4.48	8.5		4.52	10.96		4.286	10.132
		5.18	9.52		4.51	8.48		4.55	10.97		4.316	10.131
		5.22	9.52		4.54	8.51		4.58	10.98		4.346	10.132
		5.25	9.51		4.58	8.52		4.61	10.99		4.376	10.132
		5.29	9.51		4.61	8.52		4.64	10.98		4.406	10.126
		5.32	9.52		4.64	8.53		4.68	10.98		4.436	10.139
		5.36	9.53		4.67	8.53		4.71	11		4.466	10.128
		5.4	9.52		4.7	8.54		4.74	11		4.496	10.131
		5.43	9.54		4.73	8.56		4.77	11		4.526	10.145
		5.47	9.52		4.76	8.56		4.8	10.99		4.556	10.131
		5.5	9.54		4.79	8.57		4.83	10.99		4.586	10.129
		5.54	9.53		4.83	8.59		4.86	10.98		4.616	10.133
		5.58	9.53		4.86	8.6		4.9	10.99		4.646	10.117
		5.61	9.52		4.89	8.58		4.93	11.01		4.676	10.122
		5.65	9.53		4.92	8.59		4.96	11.01		4.706	10.112
		5.68	9.52		4.95	8.61		4.99	11		4.736	10.119
		5.72	9.53		4.98	8.6		5.02	11.01		4.766	10.128
		5.76	9.52		5.01	8.62		5.05	11.01		4.796	10.122
		5.79	9.54		5.05	8.61		5.09	11.01		4.826	10.131
		5.83	9.53		5.08	8.62		5.12	11.01		4.856	10.128
		5.86	9.52		5.11	8.63		5.15	11.02		4.886	10.125
		5.9	9.53		5.14	8.63		5.18	11.02		4.915	10.107
		5.94	9.54		5.17	8.64		5.21	11.02		4.945	10.118
		5.97	9.53		5.2	8.65		5.24	11.02		4.975	10.124
		6.01	9.52		5.23	8.64		5.28	11.04		5.005	10.114
		6.04	9.52		5.26	8.65		5.31	11.03		5.035	10.113
		6.08	9.54		5.3	8.67		5.34	11.02		5.065	10.111
		6.12	9.52		5.33	8.65		5.37	11.02		5.095	10.117
		6.15	9.54		5.36	8.66		5.4	11.05		5.125	10.121
		6.19	9.52		5.39	8.67		5.43	11.04		5.155	10.111
		6.22	9.54		5.42	8.67		5.47	11.03		5.185	10.119
		6.26	9.52		5.45	8.68		5.5	11.04		5.215	10.116
		6.29	9.53		5.48	8.7		5.53	11.03		5.245	10.125
		6.33	9.53		5.52	8.7		5.56	11.05		5.275	10.115
		6.37	9.52		5.55	8.69		5.59	11.05		5.305	10.115
		6.4	9.52		5.58	8.71		5.62	11.05		5.335	10.123
		6.44	9.54		5.61	8.73		5.65	11.04		5.365	10.129
		6.47	9.53		5.64	8.75		5.69	11.05		5.395	10.119
		6.51	9.52		5.67	8.75		5.72	11.05		5.425	10.117
		6.55	9.53		5.7	8.77		5.75	11.05		5.455	10.142
		6.58	9.54		5.73	8.77		5.78	11.05		5.485	10.136
		6.62	9.53		5.77	8.78		5.81	11.04		5.515	10.136
		6.65	9.55		5.8	8.8		5.84	11.05		5.545	10.148
		6.69	9.53		5.83	8.81		5.88	11.05		5.575	10.157
		6.73	9.55		5.86	8.83		5.91	11.05		5.605	10.163
		6.76	9.55		5.89	8.84		5.94	11.07		5.635	10.154
		6.8	9.54		5.92	8.85		5.97	11.06		5.665	10.145
		6.83	9.54		5.95	8.9		6	11.07		5.695	10.16
		6.87	9.53		5.99	8.91		6.03	11.06		5.725	10.179
		6.91	9.54		6.02	8.92		6.07	11.06		5.755	10.171
		6.94	9.54		6.05	8.93		6.1	11.07		5.785	10.158
		6.98	9.54		6.08	8.96		6.13	11.07		5.815	10.173
		7.01	9.55		6.11	8.98		6.16	11.08		5.845	10.169
		7.05	9.54		6.14	8.98		6.19	11.09		5.875	10.173
		7.09	9.54		6.17	9.02		6.22	11.08		5.905	10.165
		7.12	9.54		6.2	9.04		6.25	11.08		5.935	10.168
		7.16	9.54		6.24	9.06		6.29	11.08		5.965	10.158
		7.19	9.55		6.27	9.08		6.32	11.08		5.994	10.157
		7.23	9.53		6.3	9.09		6.35	11.09		6.024	10.179
		7.27	9.53		6.33	9.12		6.38	11.09		6.054	10.176
		7.3	9.53		6.36	9.15		6.41	11.09		6.084	10.162
		7.34	9.54		6.39	9.15		6.44	11.09		6.114	10.174
		7.37	9.54		6.42	9.16		6.48	11.08		6.144	10.173
		7.41	9.53		6.46	9.18		6.51	11.08		6.174	10.177
		7.45	9.54		6.49	9.2		6.54	11.09		6.204	10.18
		7.48	9.54		6.52	9.19		6.57	11.09		6.234	10.195
		7.52	9.54		6.55	9.21		6.6	11.08		6.264	10.187
		7.55	9.54		6.58	9.21		6.63	11.1		6.294	10.191
		7.59	9.56		6.61	9.23		6.67	11.1		6.324	10.188
		7.63	9.53		6.64	9.22		6.7	11.08		6.354	10.187
		7.66	9.54		6.67	9.23		6.73	11.1		6.384	10.2
		7.7	9.56		6.71	9.24		6.76	11.1		6.414	10.188
		7.73	9.55		6.74	9.25		6.79	11.1		6.444	10.187
		7.77	9.55		6.77	9.25		6.82	11.09		6.474	10.175
		7.81	9.56		6.8	9.25		6.86	11.08		6.504	10.191
		7.84	9.57		6.83	9.26		6.89	11.1		6.534	10.175
		7.88	9.56		6.86	9.27		6.92	11.1		6.564	10.185
		7.91	9.59		6.89	9.27		6.95	11.1		6.594	10.189
		7.95	9.62		6.93	9.27		6.98	11.1		6.624	10.185
		7.99	9.61		6.96	9.26		7.01	11.07		6.654	10.176
		8.02	9.65		6.99	9.28		7.04	11.1		6.684	10.188
		8.06	9.68		7.02	9.27		7.08	11.1		6.714	10.202
		8.09	9.76		7.05	9.29		7.11	11.11		6.744	10.195
		8.13	9.9		7.08	9.28		7.14	11.11		6.774	10.203
		8.17	10.15		7.11	9.28		7.17	11.1		6.804	10.206
		8.2	10.58		7.14	9.29		7.2	11.1		6.834	10.196
		8.24	11.35		7.18	9.29		7.23	11.1		6.864	10.208
		8.27	12.62		7.21	9.27		7.27	11.11		6.894	10.212
		8.31	14.58		7.24	9.27		7.3	11.11		6.924	10.213
		8.35	17.64		7.27	9.28		7.33	11.12		6.954	10.221
		8.38	21.8		7.3	9.27		7.36	11.11		6.984	10.212
		8.42	26.9		7.33	9.28		7.39	11.12		7.014	10.212
		8.45	32.71		7.36	9.29		7.42	11.13		7.044	10.222
		8.49	39.03		7.4	9.29		7.46	11.13		7.073	10.21
		8.53	45.61		7.43	9.3		7.49	11.13		7.103	10.221
		8.56	51.69		7.46	9.29		7.52	11.13		7.133	10.22
		8.6	56.68		7.49	9.29		7.55	11.11		7.163	10.22
		8.63	60.58		7.52	9.27		7.58	11.13		7.193	10.226
		8.67	63.39		7.55	9.3		7.61	11.12		7.223	10.221
		8.71	65.16		7.58	9.29		7.64	11.14		7.253	10.223
		8.74	65.97		7.61	9.29		7.68	11.15		7.283	10.219
		8.78	66.07		7.65	9.29		7.71	11.14		7.313	10.23
		8.81	65.8		7.68	9.29		7.74	11.15		7.343	10.214
		8.85	65.33		7.71	9.3		7.77	11.14		7.373	10.224
		8.88	64.8		7.74	9.3		7.8	11.14		7.403	10.236
		8.92	64.33		7.77	9.29		7.83	11.15		7.433	10.245
		8.96	63.99		7.8	9.3		7.87	11.15		7.463	10.256
		8.99	63.74		7.83	9.28		7.9	11.15		7.493	10.253
		9.03	63.59		7.87	9.31		7.93	11.16		7.523	10.272
		9.06	63.5		7.9	9.29		7.96	11.16		7.553	10.287
		9.1	63.45		7.93	9.3		7.99	11.15		7.583	10.309
		9.14	63.46		7.96	9.31		8.02	11.17		7.613	10.335
		9.17	63.46		7.99	9.32		8.06	11.16		7.643	10.408
		9.21	63.53		8.02	9.33		8.09	11.16		7.673	10.474
		9.24	63.61		8.05	9.34		8.12	11.16		7.703	10.571
		9.28	63.68		8.08	9.36		8.15	11.17		7.733	10.705
		9.32	63.77		8.12	9.38		8.18	11.17		7.763	10.86
		9.35	63.85		8.15	9.4		8.21	11.2		7.793	11.075
		9.39	63.94		8.18	9.42		8.25	11.21		7.823	11.299
		9.42	64.03		8.21	9.45		8.28	11.25		7.853	11.585
		9.46	64.12		8.24	9.44		8.31	11.31		7.883	11.908
		9.5	64.18		8.27	9.48		8.34	11.37		7.913	12.306
		9.53	64.26		8.3	9.5		8.37	11.43		7.943	12.742
		9.57	64.32		8.34	9.53		8.4	11.53		7.973	13.218
		9.6	64.38		8.37	9.57		8.43	11.65		8.003	13.736
		9.64	64.43		8.4	9.59		8.47	11.77		8.033	14.32
		9.68	64.46		8.43	9.63		8.5	11.89		8.063	14.95
		9.71	64.48		8.46	9.65		8.53	11.98		8.093	15.606
		9.75	64.46		8.49	9.69		8.56	12.11		8.123	16.28
		9.78	64.48		8.52	9.71		8.59	12.2		8.153	17.031
		9.82	64.46		8.56	9.75		8.62	12.3		8.182	17.814
		9.86	64.44		8.59	9.76		8.66	12.37		8.212	18.645
		9.89	64.38		8.62	9.8		8.69	12.42		8.242	19.525
		9.93	64.32		8.65	9.83		8.72	12.47		8.272	20.437
		9.96	64.26		8.68	9.85		8.75	12.48		8.302	21.39
		10	64.18		8.71	9.89		8.78	12.51		8.332	22.313
		10.04	64.07		8.74	9.91		8.81	12.51		8.362	23.284
		10.07	63.94		8.77	9.94		8.85	12.47		8.392	24.119
		10.11	63.82		8.81	9.94		8.88	12.47		8.422	24.928
		10.14	63.66		8.84	9.96		8.91	12.45		8.452	25.563
		10.18	63.49		8.87	9.97		8.94	12.44		8.482	26.058
		10.22	63.32		8.9	9.97		8.97	12.44		8.512	26.357
		10.25	63.13		8.93	9.96		9	12.44		8.542	26.471
		10.29	62.93		8.96	9.95		9.03	12.43		8.572	26.442
		10.32	62.72		8.99	9.94		9.07	12.43		8.602	26.237
		10.36	62.5		9.03	9.92		9.1	12.44		8.632	25.888
		10.4	62.29		9.06	9.92		9.13	12.45		8.662	25.423
		10.43	62.08		9.09	9.89		9.16	12.47		8.692	24.854
		10.47	61.82		9.12	9.87		9.19	12.48		8.722	24.237
		10.5	61.56		9.15	9.85		9.22	12.51		8.752	23.559
		10.54	61.33		9.18	9.82		9.26	12.54		8.782	22.895
		10.58	61.06		9.21	9.8		9.29	12.57		8.812	22.214
		10.61	60.81		9.24	9.78		9.32	12.61		8.842	21.582
		10.65	60.54		9.28	9.77		9.35	12.64		8.872	20.979
		10.68	60.25		9.31	9.74		9.38	12.69		8.902	20.456
		10.72	59.99		9.34	9.73		9.41	12.72		8.932	19.97
		10.76	59.71		9.37	9.72		9.45	12.76		8.962	19.533
		10.79	59.45		9.4	9.69		9.48	12.79		8.992	19.15
		10.83	59.19		9.43	9.68		9.51	12.82		9.022	18.811
		10.86	58.94		9.46	9.69		9.54	12.87		9.052	18.476
		10.9	58.68		9.5	9.67		9.57	12.92		9.082	18.183
		10.94	58.51		9.53	9.65		9.6	12.97		9.112	17.929
		10.97	58.34		9.56	9.65		9.64	13.01		9.142	17.693
		11.01	58.21		9.59	9.64		9.67	13.04		9.172	17.513
		11.04	58.09		9.62	9.64		9.7	13.07		9.202	17.319
		11.08	58.04		9.65	9.63		9.73	13.12		9.232	17.142
		11.12	58.03		9.68	9.61		9.76	13.15		9.261	17.022
		11.15	58.09		9.71	9.61		9.79	13.21		9.291	16.876
		11.19	58.2		9.75	9.61		9.82	13.25		9.321	16.768
		11.22	58.39		9.78	9.6		9.86	13.28		9.351	16.674
		11.26	58.64		9.81	9.59		9.89	13.34		9.381	16.583
		11.29	58.94		9.84	9.58		9.92	13.38		9.411	16.522
		11.33	59.29		9.87	9.59		9.95	13.42		9.441	16.428
		11.37	59.73		9.9	9.6		9.98	13.48		9.471	16.419
		11.4	60.23		9.93	9.57		10.01	13.48		9.501	16.375
		11.44	60.76		9.97	9.58		10.05	13.54		9.531	16.347
		11.47	61.28		10	9.58		10.08	13.59		9.561	16.331
		11.51	61.83		10.03	9.58		10.11	13.63		9.591	16.319
		11.55	62.37		10.06	9.59		10.14	13.67		9.621	16.327
		11.58	62.89		10.09	9.58		10.17	13.69		9.651	16.328
		11.62	63.34		10.12	9.59		10.2	13.74		9.681	16.323
		11.65	63.74		10.15	9.59		10.24	13.79		9.711	16.346
		11.69	64.06		10.18	9.59		10.27	13.83		9.741	16.35
		11.73	64.29		10.22	9.59		10.3	13.87		9.771	16.381
		11.76	64.4		10.25	9.58		10.33	13.91		9.801	16.415
		11.8	64.41		10.28	9.59		10.36	13.95		9.831	16.445
		11.83	64.3		10.31	9.6		10.39	14		9.861	16.495
		11.87	64.08		10.34	9.61		10.42	14.05		9.891	16.548
		11.91	63.72		10.37	9.59		10.46	14.08		9.921	16.6
		11.94	63.22		10.4	9.6		10.49	14.11		9.951	16.628
		11.98	62.61		10.44	9.61		10.52	14.15		9.981	16.706
		12.01	61.93		10.47	9.62		10.55	14.22		10.011	16.783
		12.05	61.18		10.5	9.63		10.58	14.25		10.041	16.89
		12.09	60.32		10.53	9.64		10.61	14.28		10.071	16.964
		12.12	59.37		10.56	9.66		10.65	14.32		10.101	17.05
		12.16	58.38		10.59	9.66		10.68	14.35		10.131	17.171
		12.19	57.41		10.62	9.7		10.71	14.42		10.161	17.298
		12.23	56.4		10.65	9.72		10.74	14.46		10.191	17.424
		12.27	55.33		10.69	9.73		10.77	14.5		10.221	17.581
		12.3	54.27		10.72	9.76		10.8	14.55		10.251	17.74
		12.34	53.23		10.75	9.78		10.84	14.62		10.281	17.902
		12.37	52.24		10.78	9.82		10.87	14.68		10.311	18.107
		12.41	51.26		10.81	9.83		10.9	14.74		10.34	18.302
		12.45	50.29		10.84	9.89		10.93	14.81		10.37	18.522
		12.48	49.37		10.87	9.91		10.96	14.87		10.4	18.786
		12.52	48.46		10.91	9.93		10.99	14.96		10.43	19.055
		12.55	47.66		10.94	9.98		11.03	15.05		10.46	19.38
		12.59	46.89		10.97	10.03		11.06	15.14		10.49	19.69
		12.63	46.18		11	10.09		11.09	15.24		10.52	20.092
		12.66	45.49		11.03	10.14		11.12	15.36		10.55	20.497
		12.7	44.88		11.06	10.19		11.15	15.47		10.58	20.972
		12.73	44.35		11.09	10.25		11.18	15.61		10.61	21.477
		12.77	43.85		11.12	10.33		11.21	15.72		10.64	22.07
		12.81	43.39		11.16	10.44		11.25	15.85		10.67	22.691
		12.84	42.95		11.19	10.52		11.28	15.99		10.7	23.406
		12.88	42.59		11.22	10.6		11.31	16.14		10.73	24.194
		12.91	42.25		11.25	10.72		11.34	16.29		10.76	25.016
		12.95	41.96		11.28	10.85		11.37	16.41		10.79	25.923
		12.99	41.67		11.31	11.01		11.4	16.58		10.82	26.908
		13.02	41.39		11.34	11.13		11.44	16.74		10.85	27.98
		13.06	41.16		11.38	11.3		11.47	16.89		10.88	29.12
		13.09	40.9		11.41	11.47		11.5	17.01		10.91	30.338
		13.13	40.67		11.44	11.69		11.53	17.15		10.94	31.605
		13.17	40.38		11.47	11.88		11.56	17.28		10.97	32.907
		13.2	40.09		11.5	12.07		11.59	17.39		11	34.313
		13.24	39.78		11.53	12.32		11.63	17.51		11.03	35.83
		13.27	39.43		11.56	12.57		11.66	17.59		11.06	37.381
		13.31	39.03		11.59	12.84		11.69	17.67		11.09	38.964
		13.35	38.56		11.63	13.06		11.72	17.74		11.12	40.613
		13.38	38.02		11.66	13.32		11.75	17.79		11.15	42.304
		13.42	37.43		11.69	13.58		11.78	17.8		11.18	44.049
		13.45	36.82		11.72	13.9		11.81	17.82		11.21	45.756
		13.49	36.13		11.75	14.17		11.85	17.82		11.24	47.608
		13.53	35.38		11.78	14.41		11.88	17.81		11.27	49.372
		13.56	34.59		11.81	14.68		11.91	17.77		11.3	51.162
		13.6	33.78		11.85	14.96		11.94	17.74		11.33	52.828
		13.63	32.95		11.88	15.22		11.97	17.7		11.36	54.551
		13.67	32.11		11.91	15.46		12	17.62		11.39	56.189
		13.71	31.25		11.94	15.69		12.04	17.56		11.419	57.735
		13.74	30.38		11.97	15.92		12.07	17.47		11.449	59.205
		13.78	29.59		12	16.14		12.1	17.4		11.479	60.571
		13.81	28.85		12.03	16.36		12.13	17.31		11.509	61.85
		13.85	28.08		12.06	16.53		12.16	17.2		11.539	62.98
		13.88	27.36		12.1	16.7		12.19	17.1		11.569	64.138
		13.92	26.63		12.13	16.86		12.23	16.99		11.599	65.119
		13.96	26.01		12.16	17.02		12.26	16.9		11.629	66.048
		13.99	25.42		12.19	17.16		12.29	16.8		11.659	66.78
		14.03	24.83		12.22	17.27		12.32	16.7		11.689	67.443
		14.06	24.3		12.25	17.4		12.35	16.6		11.719	67.984
		14.1	23.77		12.28	17.52		12.38	16.52		11.749	68.387
		14.14	23.28		12.32	17.65		12.42	16.44		11.779	68.701
		14.17	22.85		12.35	17.76		12.45	16.36		11.809	68.897
		14.21	22.41		12.38	17.85		12.48	16.29		11.839	68.995
		14.24	21.98		12.41	17.97		12.51	16.22		11.869	68.946
		14.28	21.57		12.44	18.08		12.54	16.2		11.899	68.744
		14.32	21.18		12.47	18.21		12.57	16.14		11.929	68.479
		14.35	20.82		12.5	18.31		12.6	16.1		11.959	68.131
		14.39	20.48		12.53	18.46		12.64	16.08		11.989	67.713
		14.42	20.12		12.57	18.62		12.67	16.05		12.019	67.22
		14.46	19.78		12.6	18.79		12.7	16.06		12.049	66.649
		14.5	19.45		12.63	18.96		12.73	16.06		12.079	66.003
		14.53	19.14		12.66	19.12		12.76	16.08		12.109	65.334
		14.57	18.81		12.69	19.33		12.79	16.12		12.139	64.613
		14.6	18.5		12.72	19.54		12.83	16.17		12.169	63.851
		14.64	18.21		12.75	19.78		12.86	16.22		12.199	63.037
		14.68	17.93		12.79	20		12.89	16.27		12.229	62.227
		14.71	17.66		12.82	20.26		12.92	16.34		12.259	61.376
		14.75	17.41		12.85	20.54		12.95	16.41		12.289	60.504
		14.78	17.15		12.88	20.86		12.98	16.5		12.319	59.656
		14.82	16.91		12.91	21.17		13.02	16.57		12.349	58.798
		14.86	16.67		12.94	21.47		13.05	16.66		12.379	57.905
		14.89	16.47		12.97	21.83		13.08	16.75		12.409	57.073
		14.93	16.27		13	22.23		13.11	16.83		12.439	56.24
		14.96	16.06		13.04	22.64		13.14	16.91		12.469	55.459
		15	15.87		13.07	23.03		13.17	17.01		12.499	54.707
		15.04	15.71		13.1	23.42		13.2	17.06		12.528	53.993
		15.07	15.54		13.13	23.89		13.24	17.14		12.558	53.316
		15.11	15.35		13.16	24.4		13.27	17.19		12.588	52.673
		15.14	15.19		13.19	24.92		13.3	17.23		12.618	52.097
		15.18	15.01		13.22	25.33		13.33	17.27		12.648	51.518
		15.22	14.84		13.26	25.83		13.36	17.32		12.678	50.993
		15.25	14.67		13.29	26.37		13.39	17.34		12.708	50.47
		15.29	14.51		13.32	26.92		13.43	17.35		12.738	50.016
		15.32	14.32		13.35	27.41		13.46	17.35		12.768	49.511
		15.36	14.17		13.38	27.86		13.49	17.33		12.798	49.082
		15.4	14		13.41	28.4		13.52	17.32		12.828	48.64
		15.43	13.85		13.44	28.9		13.55	17.29		12.858	48.193
		15.47	13.7		13.47	29.41		13.58	17.27		12.888	47.815
		15.5	13.57		13.51	29.82		13.62	17.24		12.918	47.398
		15.54	13.42		13.54	30.26		13.65	17.19		12.948	46.955
		15.58	13.33		13.57	30.72		13.68	17.13		12.978	46.507
		15.61	13.22		13.6	31.16		13.71	17.08		13.008	46.083
		15.65	13.12		13.63	31.57		13.74	17.02		13.038	45.624
		15.68	13.03		13.66	31.9		13.77	16.95		13.068	45.164
		15.72	12.96		13.69	32.27		13.81	16.9		13.098	44.666
		15.76	12.88		13.73	32.68		13.84	16.82		13.128	44.153
		15.79	12.82		13.76	33.04		13.87	16.75		13.158	43.624
		15.83	12.77		13.79	33.38		13.9	16.69		13.188	43.044
		15.86	12.68		13.82	33.7		13.93	16.62		13.218	42.473
		15.9	12.63		13.85	34.06		13.96	16.56		13.248	41.842
		15.94	12.58		13.88	34.45		13.99	16.51		13.278	41.201
		15.97	12.52		13.91	34.85		14.03	16.44		13.308	40.526
		16.01	12.49		13.95	35.2		14.06	16.4		13.338	39.827
		16.04	12.45		13.98	35.59		14.09	16.37		13.368	39.075
		16.08	12.43		14.01	36.04		14.12	16.34		13.398	38.361
		16.12	12.4		14.04	36.52		14.15	16.34		13.428	37.582
		16.15	12.42		14.07	37.02		14.18	16.33		13.458	36.803
		16.19	12.42		14.1	37.46		14.22	16.34		13.488	36.013
		16.22	12.47		14.13	38.07		14.25	16.37		13.518	35.199
		16.26	12.55		14.16	38.69		14.28	16.39		13.548	34.41
		16.29	12.65		14.2	39.36		14.31	16.45		13.578	33.605
		16.33	12.77		14.23	40		14.34	16.54		13.607	32.852
		16.37	12.96		14.26	40.66		14.37	16.57		13.637	32.067
		16.4	13.14		14.29	41.49		14.41	16.66		13.667	31.296
		16.44	13.32		14.32	42.37		14.44	16.76		13.697	30.542
		16.47	13.52		14.35	43.31		14.47	16.86		13.727	29.822
		16.51	13.69		14.38	44.1		14.5	16.94		13.757	29.125
		16.55	13.85		14.42	45.11		14.53	17.05		13.787	28.43
		16.58	13.98		14.45	46.23		14.56	17.15		13.817	27.79
		16.62	14.06		14.48	47.44		14.59	17.28		13.847	27.126
		16.65	14.11		14.51	48.61		14.63	17.39		13.877	26.484
		16.69	14.11		14.54	49.75		14.66	17.49		13.907	25.886
		16.73	14.09		14.57	51.21		14.69	17.61		13.937	25.256
		16.76	14.03		14.6	52.84		14.72	17.72		13.967	24.667
		16.8	13.93		14.63	54.6		14.75	17.87		13.997	24.089
		16.83	13.84		14.67	56.2		14.78	18		14.027	23.56
		16.87	13.75		14.7	58.1		14.82	18.14		14.057	23.014
		16.91	13.68		14.73	60.35		14.85	18.28		14.087	22.495
		16.94	13.61		14.76	62.79		14.88	18.44		14.117	21.987
		16.98	13.56		14.79	65.42		14.91	18.63		14.147	21.528
		17.01	13.54		14.82	67.8		14.94	18.82		14.177	21.096
		17.05	13.52		14.85	70.99		14.97	18.95		14.207	20.66
		17.09	13.54		14.89	74.45		15.01	19.15		14.237	20.255
		17.12	13.57		14.92	78.13		15.04	19.33		14.267	19.854
		17.16	13.62		14.95	81.61		15.07	19.52		14.297	19.502
		17.19	13.64		14.98	85.19		15.1	19.68		14.327	19.155
		17.23	13.65		15.01	89.35		15.13	19.8		14.357	18.82
		17.27	13.66		15.04	93.67		15.16	19.93		14.387	18.501
		17.3	13.64		15.07	98.03		15.2	20.04		14.417	18.186
		17.34	13.61		15.1	101.51		15.23	20.14		14.447	17.884
		17.37	13.59		15.14	105.32		15.26	20.2		14.477	17.582
		17.41	13.51		15.17	109.15		15.29	20.24		14.507	17.293
		17.45	13.43		15.2	112.53		15.32	20.26		14.537	17.03
		17.48	13.35		15.23	115.23		15.35	20.28		14.567	16.779
		17.52	13.27		15.26	117.14		15.38	20.26		14.597	16.532
		17.55	13.22		15.29	118.85		15.42	20.25		14.627	16.272
		17.59	13.2		15.32	119.76		15.45	20.22		14.657	16.052
		17.63	13.18		15.36	119.81		15.48	20.18		14.686	15.823
		17.66	13.2		15.39	119.18		15.51	20.14		14.716	15.631
		17.7	13.24		15.42	117.84		15.54	20.07		14.746	15.429
		17.73	13.31		15.45	115.59		15.57	20.05		14.776	15.246
		17.77	13.4		15.48	112.6		15.61	20		14.806	15.077
		17.81	13.49		15.51	109.06		15.64	19.94		14.836	14.901
		17.84	13.6		15.54	105.92		15.67	19.93		14.866	14.751
		17.88	13.67		15.57	101.7		15.7	19.92		14.896	14.6
		17.91	13.75		15.61	97.09		15.73	19.91		14.926	14.471
		17.95	13.8		15.64	92.34		15.76	19.92		14.956	14.339
		17.99	13.83		15.67	88.05		15.8	19.96		14.986	14.181
		18.02	13.82		15.7	84.1		15.83	20.02		15.016	14.087
		18.06	13.81		15.73	79.59		15.86	20.11		15.046	13.948
		18.09	13.77		15.76	75.28		15.89	20.2		15.076	13.843
		18.13	13.7		15.79	71.23		15.92	20.36		15.106	13.739
		18.17	13.61		15.83	68.11		15.95	20.55		15.136	13.622
		18.2	13.5		15.86	64.89		15.98	20.79		15.166	13.536
		18.24	13.35		15.89	61.76		16.02	21.01		15.196	13.437
		18.27	13.23		15.92	58.93		16.05	21.33		15.226	13.361
		18.31	13.07		15.95	56.44		16.08	21.72		15.256	13.28
		18.35	12.89		15.98	54.58		16.11	22.22		15.286	13.208
		18.38	12.69		16.01	52.44		16.14	22.79		15.316	13.153
		18.42	12.51		16.04	50.53		16.17	23.33		15.346	13.091
		18.45	12.32		16.08	48.81		16.21	24.05		15.376	13.028
		18.49	12.13		16.11	47.37		16.24	24.96		15.406	12.964
		18.53	11.94		16.14	46.03		16.27	25.97		15.436	12.926
		18.56	11.75		16.17	44.57		16.3	27.13		15.466	12.891
		18.6	11.6		16.2	43.19		16.33	28.25		15.496	12.846
		18.63	11.44		16.23	41.8		16.36	29.85		15.526	12.807
		18.67	11.3		16.26	40.77		16.4	31.75		15.556	12.774
		18.71	11.17		16.3	39.47		16.43	33.97		15.586	12.738
		18.74	11.04		16.33	38.19		16.46	36.33		15.616	12.69
		18.78	10.93		16.36	36.9		16.49	39.01		15.646	12.672
		18.81	10.81		16.39	35.77		16.52	42.58		15.676	12.641
		18.85	10.73		16.42	34.77		16.55	46.8		15.706	12.613
		18.88	10.65		16.45	33.59		16.59	51.61		15.736	12.576
		18.92	10.57		16.48	32.47		16.62	56.13		15.765	12.571
		18.96	10.48		16.51	31.41		16.65	61.25		15.795	12.562
		18.99	10.41		16.55	30.57		16.68	67.14		15.825	12.531
		19.03	10.34		16.58	29.73		16.71	73.09		15.855	12.517
		19.06	10.28		16.61	28.86		16.74	78.83		15.885	12.493
		19.1	10.22		16.64	28.07		16.77	83.06		15.915	12.497
		19.14	10.16		16.67	27.36		16.81	87.8		15.945	12.494
		19.17	10.12		16.7	26.82		16.84	91.94		15.975	12.477
		19.21	10.07		16.73	26.21		16.87	95.34		16.005	12.482
		19.24	10.03		16.77	25.63		16.9	97.91		16.035	12.482
		19.28	10.01		16.8	25.11		16.93	99.53		16.065	12.493
		19.32	9.99		16.83	24.68		16.96	100.88		16.095	12.504
		19.35	9.98		16.86	24.28		17	101.54		16.125	12.507
		19.39	9.95		16.89	23.86		17.03	101.44		16.155	12.515
		19.42	9.95		16.92	23.48		17.06	100.82		16.185	12.531
		19.46	9.95		16.95	23.13		17.09	99.8		16.215	12.556
		19.5	9.96		16.98	22.87		17.12	98.07		16.245	12.556
		19.53	9.94		17.02	22.64		17.15	95.78		16.275	12.578
		19.57	9.94		17.05	22.41		17.19	93.02		16.305	12.582
		19.6	9.94		17.08	22.22		17.22	90.37		16.335	12.602
		19.64	9.89		17.11	22.09		17.25	87.29		16.365	12.626
		19.68	9.88		17.14	22		17.28	83.63		16.395	12.642
		19.71	9.87		17.17	21.91		17.31	79.75		16.425	12.679
		19.75	9.83		17.2	21.83		17.34	75.8		16.455	12.688
		19.78	9.8		17.24	21.77		17.37	72.61		16.485	12.691
		19.82	9.78		17.27	21.72		17.41	68.85		16.515	12.725
		19.86	9.75		17.3	21.67		17.44	65.03		16.545	12.734
		19.89	9.72		17.33	21.57		17.47	61.4		16.575	12.753
		19.93	9.69		17.36	21.46		17.5	58.08		16.605	12.775
		19.96	9.65		17.39	21.3		17.53	55.44		16.635	12.792
		20	9.64		17.42	21.14		17.56	52.37		16.665	12.805
		20.04	9.61		17.45	20.91		17.6	49.57		16.695	12.814
		20.07	9.59		17.49	20.63		17.63	47.02		16.725	12.837
		20.11	9.56		17.52	20.32		17.66	44.88		16.755	12.855
		20.14	9.55		17.55	20		17.69	43.01		16.785	12.882
		20.18	9.51		17.58	19.69		17.72	41.04		16.815	12.902
		20.22	9.51		17.61	19.28		17.75	39.16		16.845	12.931
		20.25	9.48		17.64	18.87		17.79	37.41		16.874	12.96
		20.29	9.48		17.67	18.45		17.82	36.02		16.904	12.979
		20.32	9.46		17.71	18.11		17.85	34.54		16.934	13.031
		20.36	9.45		17.74	17.75		17.88	32.99		16.964	13.052
		20.4	9.48		17.77	17.37		17.91	31.52		16.994	13.092
		20.43	9.49		17.8	17.02		17.94	30.11		17.024	13.106
		20.47	9.51		17.83	16.67		17.98	29		17.054	13.159
		20.5	9.55		17.86	16.44		18.01	27.73		17.084	13.199
		20.54	9.57		17.89	16.16		18.04	26.45		17.114	13.232
		20.58	9.62		17.92	15.91		18.07	25.19		17.144	13.299
		20.61	9.68		17.96	15.69		18.1	24.06		17.174	13.361
		20.65	9.73		17.99	15.5		18.13	23.18		17.204	13.442
		20.68	9.8		18.02	15.35		18.16	22.06		17.234	13.534
		20.72	9.86		18.05	15.17		18.2	21.04		17.264	13.685
		20.76	9.91		18.08	15.03		18.23	20.05		17.294	13.84
		20.79	9.96		18.11	14.9		18.26	19.19		17.324	14.013
		20.83	10		18.14	14.82		18.29	18.44		17.354	14.231
		20.86	10.03		18.18	14.7		18.32	17.61		17.384	14.48
		20.9	10.05		18.21	14.6		18.35	16.86		17.414	14.758
		20.94	10.05		18.24	14.51		18.39	16.16		17.444	15.07
		20.97	10.01		18.27	14.43		18.42	15.59		17.474	15.408
		21.01	10		18.3	14.36		18.45	15.05		17.504	15.742
		21.04	9.95		18.33	14.26		18.48	14.5		17.534	16.073
		21.08	9.92		18.36	14.16		18.51	13.98		17.564	16.397
		21.12	9.84		18.39	14.06		18.54	13.54		17.594	16.718
		21.15	9.79		18.43	13.98		18.58	13.2		17.624	16.979
		21.19	9.75		18.46	13.87		18.61	12.82		17.654	17.231
		21.22	9.69		18.49	13.75		18.64	12.47		17.684	17.406
		21.26	9.65		18.52	13.61		18.67	12.17		17.714	17.538
		21.29	9.6		18.55	13.47		18.7	11.89		17.744	17.619
		21.33	9.59		18.58	13.36		18.73	11.67		17.774	17.652
		21.37	9.57		18.61	13.21		18.76	11.42		17.804	17.631
		21.4	9.56		18.65	13.06		18.8	11.2		17.834	17.543
		21.44	9.55		18.68	12.91		18.83	11		17.864	17.44
		21.47	9.54		18.71	12.77		18.86	10.83		17.894	17.305
		21.51	9.55		18.74	12.66		18.89	10.69		17.924	17.136
		21.55	9.56		18.77	12.51		18.92	10.55		17.953	16.928
		21.58	9.59		18.8	12.39		18.95	10.4		17.983	16.711
		21.62	9.61		18.83	12.24		18.99	10.28		18.013	16.509
		21.65	9.64		18.86	12.12		19.02	10.18		18.043	16.258
		21.69	9.67		18.9	11.99		19.05	10.09		18.073	16.056
		21.73	9.71		18.93	11.86		19.08	10		18.103	15.831
		21.76	9.73		18.96	11.76		19.11	9.92		18.133	15.62
		21.8	9.76		18.99	11.64		19.14	9.86		18.163	15.414
		21.83	9.79		19.02	11.55		19.18	9.81		18.193	15.196
		21.87	9.83		19.05	11.43		19.21	9.76		18.223	15.02
		21.91	9.86		19.08	11.31		19.24	9.71		18.253	14.837
		21.94	9.89		19.12	11.19		19.27	9.68		18.283	14.671
		21.98	9.93		19.15	11.1		19.3	9.64		18.313	14.518
		22.01	9.97		19.18	11		19.33	9.61		18.343	14.353
		22.05	10.01		19.21	10.88		19.37	9.6		18.373	14.212
		22.09	10.04		19.24	10.78		19.4	9.57		18.403	14.058
		22.12	10.1		19.27	10.66		19.43	9.54		18.433	13.928
		22.16	10.18		19.3	10.6		19.46	9.52		18.463	13.805
		22.19	10.26		19.34	10.49		19.49	9.51		18.493	13.67
		22.23	10.35		19.37	10.39		19.52	9.49		18.523	13.553
		22.27	10.43		19.4	10.3		19.55	9.48		18.553	13.418
		22.3	10.53		19.43	10.21		19.59	9.47		18.583	13.3
		22.34	10.56		19.46	10.13		19.62	9.46		18.613	13.198
		22.37	10.59		19.49	10.06		19.65	9.43		18.643	13.077
		22.41	10.6		19.52	9.96		19.68	9.42		18.673	13.005
		22.45	10.62		19.55	9.87		19.71	9.42		18.703	12.911
		22.48	10.62		19.59	9.8		19.74	9.4		18.733	12.813
		22.52	10.62		19.62	9.73		19.78	9.39		18.763	12.727
		22.55	10.63		19.65	9.65		19.81	9.38		18.793	12.659
		22.59	10.65		19.68	9.55		19.84	9.37		18.823	12.585
		22.63	10.64		19.71	9.47		19.87	9.37		18.853	12.521
		22.66	10.65		19.74	9.41		19.9	9.35		18.883	12.465
		22.7	10.65		19.77	9.32		19.93	9.36		18.913	12.406
		22.73	10.64		19.81	9.23		19.97	9.36		18.943	12.348
		22.77	10.67		19.84	9.14		20	9.36		18.973	12.274
		22.81	10.68		19.87	9.08		20.03	9.33		19.003	12.229
		22.84	10.68		19.9	8.99		20.06	9.35		19.032	12.162
		22.88	10.69		19.93	8.91		20.09	9.34		19.062	12.117
		22.91	10.73		19.96	8.81		20.12	9.37		19.092	12.079
		22.95	10.73		19.99	8.73		20.15	9.33		19.122	12.034
		22.99	10.74		20.02	8.64		20.19	9.35		19.152	11.963
		23.02	10.75		20.06	8.58		20.22	9.34		19.182	11.95
		23.06	10.77		20.09	8.49		20.25	9.34		19.212	11.885
		23.09	10.78		20.12	8.41		20.28	9.36		19.242	11.834
		23.13	10.78		20.15	8.32		20.31	9.36		19.272	11.813
		23.17	10.77		20.18	8.28		20.34	9.39		19.302	11.78
		23.2	10.76		20.21	8.2		20.38	9.39		19.332	11.738
		23.24	10.75		20.24	8.12		20.41	9.42		19.362	11.713
		23.27	10.74		20.28	8.04		20.44	9.45		19.392	11.685
		23.31	10.71		20.31	7.96		20.47	9.49		19.422	11.668
		23.35	10.69		20.34	7.9		20.5	9.51		19.452	11.655
		23.38	10.65		20.37	7.84		20.53	9.53		19.482	11.647
		23.42	10.61		20.4	7.76		20.57	9.58		19.512	11.677
		23.45	10.59		20.43	7.71		20.6	9.63		19.542	11.679
		23.49	10.57		20.46	7.65		20.63	9.68		19.572	11.698
		23.53	10.54		20.49	7.6		20.66	9.69		19.602	11.705
		23.56	10.48		20.53	7.56		20.69	9.71		19.632	11.721
		23.6	10.44		20.56	7.53		20.72	9.74		19.662	11.717
		23.63	10.4		20.59	7.5		20.76	9.78		19.692	11.721
		23.67	10.35		20.62	7.51		20.79	9.78		19.722	11.745
		23.71	10.32		20.65	7.5		20.82	9.79		19.752	11.767
		23.74	10.28		20.68	7.51		20.85	9.78		19.782	11.786
		23.78	10.23		20.71	7.55		20.88	9.77		19.812	11.802
		23.81	10.18		20.75	7.56		20.91	9.75		19.842	11.836
		23.85	10.16		20.78	7.6		20.94	9.76		19.872	11.828
		23.88	10.14		20.81	7.64		20.98	9.73		19.902	11.883
		23.92	10.14		20.84	7.69		21.01	9.72		19.932	11.895
		23.96	10.18		20.87	7.73		21.04	9.7		19.962	11.931
		23.99	10.24		20.9	7.77		21.07	9.67		19.992	11.939
					20.93	7.81		21.1	9.65		20.022	11.958
					20.96	7.86		21.13	9.65		20.052	12.014
					21	7.93		21.17	9.65		20.082	12.022
					21.03	7.96		21.2	9.64		20.112	12.037
					21.06	8		21.23	9.65		20.141	12.06
					21.09	8		21.26	9.66		20.171	12.072
					21.12	8		21.29	9.67		20.201	12.102
					21.15	8		21.32	9.71		20.231	12.122
					21.18	7.98		21.36	9.75		20.261	12.164
					21.22	7.96		21.39	9.78		20.291	12.158
					21.25	7.9		21.42	9.8		20.321	12.167
					21.28	7.85		21.45	9.84		20.351	12.217
					21.31	7.79		21.48	9.86		20.381	12.224
					21.34	7.74		21.51	9.89		20.411	12.227
					21.37	7.68		21.54	9.91		20.441	12.267
					21.4	7.62		21.58	9.95		20.471	12.261
					21.43	7.57		21.61	9.99		20.501	12.275
					21.47	7.53		21.64	9.99		20.531	12.278
					21.5	7.5		21.67	10.02		20.561	12.299
					21.53	7.49		21.7	10.05		20.591	12.277
					21.56	7.49		21.73	10.06		20.621	12.274
					21.59	7.49		21.77	10.06		20.651	12.268
					21.62	7.52		21.8	10.05		20.681	12.268
					21.65	7.57		21.83	10.06		20.711	12.247
					21.69	7.63		21.86	10.07		20.741	12.246
					21.72	7.73		21.89	10.09		20.771	12.227
					21.75	7.83		21.92	10.08		20.801	12.223
					21.78	7.93		21.96	10.09		20.831	12.235
					21.81	8.06		21.99	10.08		20.861	12.2
					21.84	8.21		22.02	10.11		20.891	12.192
					21.87	8.34		22.05	10.12		20.921	12.18
					21.9	8.48		22.08	10.15		20.951	12.173
					21.94	8.63		22.11	10.18		20.981	12.164
					21.97	8.78		22.15	10.25		21.011	12.152
					22	8.9		22.18	10.32		21.041	12.157
					22.03	9.02		22.21	10.41		21.071	12.136
					22.06	9.16		22.24	10.51		21.101	12.141
					22.09	9.23		22.27	10.58		21.131	12.115
					22.12	9.35		22.3	10.62		21.161	12.125
					22.16	9.45		22.33	10.65		21.191	12.128
					22.19	9.5		22.37	10.69		21.22	12.1
					22.22	9.55		22.4	10.73		21.25	12.1
					22.25	9.59		22.43	10.74		21.28	12.098
					22.28	9.61		22.46	10.76		21.31	12.078
					22.31	9.63		22.49	10.77		21.34	12.077
					22.34	9.64		22.52	10.77		21.37	12.076
					22.37	9.66		22.56	10.76		21.4	12.056
					22.41	9.65		22.59	10.77		21.43	12.043
					22.44	9.68		22.62	10.77		21.46	12.046
					22.47	9.67		22.65	10.76		21.49	12.048
					22.5	9.68		22.68	10.76		21.52	12.031
					22.53	9.67		22.71	10.77		21.55	12.043
					22.56	9.6		22.75	10.77		21.58	12.005
					22.59	9.57		22.78	10.77		21.61	12.008
					22.63	9.52		22.81	10.77		21.64	12.009
					22.66	9.48		22.84	10.77		21.67	12.01
					22.69	9.45		22.87	10.78		21.7	12.02
					22.72	9.4		22.9	10.79		21.73	12.031
					22.75	9.36		22.93	10.79		21.76	12.037
					22.78	9.35		22.97	10.79		21.79	12.055
					22.81	9.29		23	10.78		21.82	12.048
					22.84	9.28		23.03	10.77		21.85	12.044
					22.88	9.25		23.06	10.76		21.88	12.013
					22.91	9.23		23.09	10.76		21.91	11.977
					22.94	9.21		23.12	10.76		21.94	11.93
					22.97	9.19		23.16	10.75		21.97	11.89
					23	9.18		23.19	10.72		22	11.834
					23.03	9.17		23.22	10.72		22.03	11.774
					23.06	9.18		23.25	10.69		22.06	11.682
					23.1	9.18		23.28	10.68		22.09	11.618
					23.13	9.18		23.31	10.65		22.12	11.55
					23.16	9.18		23.35	10.63		22.15	11.48
					23.19	9.17		23.38	10.61		22.18	11.399
					23.22	9.17		23.41	10.6		22.21	11.327
					23.25	9.17		23.44	10.57		22.24	11.266
					23.28	9.19		23.47	10.55		22.27	11.2
					23.31	9.18		23.5	10.52		22.299	11.139
					23.35	9.2		23.54	10.49		22.329	11.085
					23.38	9.21		23.57	10.47		22.359	11.017
					23.41	9.22		23.6	10.43		22.389	10.983
					23.44	9.23		23.63	10.4		22.419	10.908
					23.47	9.24		23.66	10.38		22.449	10.888
					23.5	9.27		23.69	10.35		22.479	10.825
					23.53	9.27		23.72	10.31		22.509	10.782
					23.57	9.29		23.76	10.31		22.539	10.734
					23.6	9.3		23.79	10.29		22.569	10.713
					23.63	9.31		23.82	10.31		22.599	10.676
					23.66	9.34		23.85	10.34		22.629	10.631
					23.69	9.38		23.88	10.41		22.659	10.611
					23.72	9.38		23.91	10.52		22.689	10.564
					23.75	9.42		23.95	10.68		22.719	10.537
					23.78	9.45		23.98	10.89		22.749	10.511
					23.82	9.51					22.779	10.486
					23.85	9.56					22.809	10.455
					23.88	9.63					22.839	10.419
					23.91	9.7					22.869	10.404
					23.94	9.76					22.899	10.384
					23.97	9.85					22.929	10.357
											22.959	10.329
											22.989	10.323
											23.019	10.308
											23.049	10.298
											23.079	10.288
											23.109	10.303
											23.139	10.29
											23.169	10.314
											23.199	10.328
											23.229	10.331
											23.259	10.337
											23.289	10.376
											23.319	10.367
											23.349	10.398
											23.378	10.402
											23.408	10.429
											23.438	10.422
											23.468	10.411
											23.498	10.409
											23.528	10.405
											23.558	10.405
											23.588	10.376
											23.618	10.382
											23.648	10.339
											23.678	10.297
											23.708	10.262
											23.738	10.216
											23.768	10.171
											23.798	10.111
											23.828	10.064
											23.858	10.005
											23.888	9.969
											23.918	9.932
											23.948	9.874
											23.978	9.847

## Sheet: Fig. 3e
H2 - and formate production rates for different purified HDCR variants. Enzymatic activity was calculated from n=9 measurements (3 biological replicates with 3 technical replicates, respectively).
		H2 production from formate [%]								Formate production from H2 + CO2 [%]
Biological Replicate ↓	Technical Replicate ↓	HDCR_His	HDCR_HycB3∆C	HDCR_HycB4∆C	HDCR_HycB4∆ [4Fe4S] IV			Biological Replicate ↓	Technical Replicate ↓	HDCR_His	HDCR_HycB3∆C	HDCR_HycB4∆C	HDCR_HycB4∆ [4Fe4S] IV
1	1	84.4	8.9	1.1	1			1	1	86.3	36.6	7.4	18.9
	2	93.2	9	1.2	1.1				2	86.3	29.4	0	13
	3	95.3	16.9	1.1	2.7				3	75.4	27.9	9	14.2
2	1	122.3	17.6	3.6	5.2			2	1	114.5	29.4	9.1	24.8
	2	94.7	11.7	6.3	4.6				2	83.1	30.7	9.4	12.5
	3	108.3	29.7	2	4.9				3	120.1	10.3	0	11.5
3	1	98.1	23.4	3.1	12.4			3	1	113.3	33.8	0.3	2
	2	102.8	25.2	2.6	6.9				2	88.1	50.5	4.2	5.6
	3	101	23	2.4	12.3				3	133	52.6	6.6	2.7
	Average	100.011	18.3778	2.6	5.67778				Average	100.011	33.4667	5.11111	11.6889
Mean value for HDCR_His from n=9 values was calculated and set to 100 % relative activity, respectively. Relative activities of other Samples have been calculated accordingly. Raw data of catalytic activities used for calculating relative activities are displayed below.
		H2 production from formate [µmol min-1 mg-1]								Formate production from H2 + CO2 [µmol min-1 mg-1]
Biological Replicate ↓	Technical Replicate ↓	HDCR_His	HDCR_HycB3∆C	HDCR_HycB4∆C	HDCR_HycB4∆ [4Fe4S] IV			Biological Replicate ↓	Technical Replicate ↓	HDCR_His	HDCR_HycB3∆C	HDCR_HycB4∆C	HDCR_HycB4∆ [4Fe4S] IV
1	1	1073.8	112.83	13.83	12.41			1	1	713.22	302.58	61.12	156.32
	2	1186.4	114.8	14.83	13.63				2	713.22	242.76	0	107.47
	3	1212.6	215.56	13.37	34.55				3	623.08	230.58	74.68	117.34
2	1	1556	223.85	45.71	66.45			2	1	946.18	242.76	75.26	205.16
	2	1204.8	148.6	80.11	58.46				2	687.02	253.8	77.58	103.28
	3	1378.7	378.19	24.95	62.14				3	992.14	85.16	0	95.38
3	1	1248	297.85	40.09	158.12			3	1	935.96	279.16	2.72	16.61
	2	1308.7	320.45	32.57	87.57				2	727.63	417.54	34.5	45.92
	3	1286	292.45	29.94	156.67				3	1098.9	434.66	54.9	22.47
	Average	1272.78	233.842	32.8222	72.2222				Average	826.372	276.556	42.3067	96.6611

## Sheet: Fig. 3f
Size exclusion data of HDCR_His. Superose 6 Increase 10/300 GL column was used for protein separation and data was analyzed using UNICORN 5.31 software. Elution fractions F1 to F4 (marked with grey background) have been pooled and subsequently analyzed for enzymatic activity.								H2 - production from formate for different HDCR_His filament sizes generated by separation of purified HDCR_His via size exclusion. Enzymatic activity was calculated from n=6 measurements (2 biological replicates with 3 technical replicates, respectively).
	HDCR_His							Biological Replicate ↓	Technical Replicate ↓	H2 production from formate [%]
	Elution volume [ml]	mAU								F1	F2	F3	F4
	0	-0.41						Exp. 1	1	71.36	69.95	40.37	24.55
	0.03	-0.4							2	78.36	74.15	37.39	29.24
	0.06	-0.41							3	63.42	62.37	27.35	31.16
	0.08	-0.4						Exp. 2	1	124.67	113.54	74.82	51.26
	0.11	-0.39							2	151.75	104.07	66.25	46.35
	0.14	-0.4							3	110.44	75.49	58.37	33.3
	0.17	-0.39							Average	100	83.2617	50.7583	35.9767
	0.2	-0.43
	0.22	-0.46
	0.25	-0.45						Mean value for Fraction 1 from n=6 values was calculated and set to 100 % relative activity. Relative activities of all samples have been calculated accordingly. Raw data of catalytic activities used for calculating relative activities are displayed below.
	0.28	-0.44
	0.31	-0.45
	0.34	-0.45
	0.36	-0.45						Biological Replicate ↓	Technical Replicate ↓	H2 production from formate [µmol min-1 mg-1]
	0.39	-0.45								F1	F2	F3	F4
	0.42	-0.46						Exp. 1	1	291.15	285.4	164.7	100.15
	0.45	-0.44							2	319.7	302.55	152.55	119.3
	0.48	-0.4							3	258.75	254.45	111.6	127.15
	0.5	-0.39						Exp. 2	1	508.65	463.25	305.25	209.15
	0.53	-0.37							2	619.15	424.6	270.3	189.1
	0.56	-0.39							3	450.6	308	238.15	135.85
	0.59	-0.39							Average	408	339.708	207.092	146.783
	0.62	-0.39
	0.64	-0.39
	0.67	-0.4
	0.7	-0.4
	0.73	-0.39
	0.76	-0.39
	0.78	-0.38
	0.81	-0.37
	0.84	-0.4
	0.87	-0.39
	0.9	-0.38
	0.92	-0.38
	0.95	-0.38
	0.98	-0.37
	1.01	-0.37
	1.04	-0.36
	1.06	-0.36
	1.09	-0.36
	1.12	-0.35
	1.15	-0.37
	1.18	-0.39
	1.2	-0.4
	1.23	-0.43
	1.26	-0.43
	1.29	-0.42
	1.32	-0.43
	1.34	-0.41
	1.37	-0.42
	1.4	-0.43
	1.43	-0.42
	1.46	-0.43
	1.48	-0.43
	1.51	-0.41
	1.54	-0.41
	1.57	-0.42
	1.6	-0.41
	1.62	-0.43
	1.65	-0.42
	1.68	-0.43
	1.71	-0.41
	1.74	-0.41
	1.76	-0.42
	1.79	-0.4
	1.82	-0.43
	1.85	-0.46
	1.88	-0.44
	1.9	-0.45
	1.93	-0.37
	1.96	-0.39
	1.99	-0.4
	2.02	-0.38
	2.04	-0.4
	2.07	-0.41
	2.1	-0.42
	2.13	-0.45
	2.16	-0.41
	2.18	-0.43
	2.21	-0.43
	2.24	-0.4
	2.27	-0.36
	2.3	-0.38
	2.32	-0.38
	2.35	-0.36
	2.38	-0.34
	2.41	-0.35
	2.44	-0.35
	2.46	-0.36
	2.49	-0.35
	2.52	-0.34
	2.55	-0.34
	2.58	-0.38
	2.6	-0.39
	2.63	-0.38
	2.66	-0.39
	2.69	-0.37
	2.72	-0.35
	2.74	-0.34
	2.77	-0.38
	2.8	-0.36
	2.83	-0.35
	2.86	-0.35
	2.88	-0.37
	2.91	-0.34
	2.94	-0.34
	2.97	-0.34
	3	-0.33
	3.02	-0.35
	3.05	-0.41
	3.08	-0.4
	3.11	-0.4
	3.14	-0.38
	3.16	-0.4
	3.19	-0.37
	3.22	-0.35
	3.25	-0.35
	3.28	-0.36
	3.3	-0.33
	3.33	-0.34
	3.36	-0.34
	3.39	-0.33
	3.42	-0.37
	3.44	-0.39
	3.47	-0.4
	3.5	-0.4
	3.53	-0.39
	3.56	-0.38
	3.58	-0.39
	3.61	-0.38
	3.64	-0.39
	3.67	-0.39
	3.7	-0.4
	3.72	-0.38
	3.75	-0.38
	3.78	-0.38
	3.81	-0.39
	3.84	-0.39
	3.86	-0.4
	3.89	-0.39
	3.92	-0.39
	3.95	-0.37
	3.98	-0.38
	4	-0.38
	4.03	-0.37
	4.06	-0.38
	4.09	-0.38
	4.12	-0.37
	4.14	-0.37
	4.17	-0.35
	4.2	-0.38
	4.23	-0.38
	4.26	-0.38
	4.28	-0.38
	4.31	-0.38
	4.34	-0.37
	4.37	-0.37
	4.4	-0.37
	4.42	-0.36
	4.45	-0.36
	4.48	-0.36
	4.51	-0.33
	4.54	-0.31
	4.56	-0.31
	4.59	-0.3
	4.62	-0.33
	4.65	-0.35
	4.68	-0.35
	4.7	-0.33
	4.73	-0.31
	4.76	-0.3
	4.79	-0.29
	4.82	-0.33
	4.84	-0.33
	4.87	-0.32
	4.9	-0.32
	4.93	-0.34
	4.96	-0.32
	4.98	-0.3
	5.01	-0.25
	5.04	-0.23
	5.07	-0.26
	5.1	-0.26
	5.12	-0.25
	5.15	-0.24
	5.18	-0.24
	5.21	-0.24
	5.24	-0.23
	5.26	-0.23
	5.29	-0.25
	5.32	-0.29
	5.35	-0.31
	5.38	-0.29
	5.4	-0.29
	5.43	-0.27
	5.46	-0.29
	5.49	-0.27
	5.52	-0.28
	5.54	-0.27
	5.57	-0.28
	5.6	-0.25
	5.63	-0.24
	5.66	-0.22
	5.68	-0.22
	5.71	-0.24
	5.74	-0.25
	5.77	-0.28
	5.8	-0.26
	5.82	-0.22
	5.85	-0.19
	5.88	-0.21
	5.91	-0.21
	5.94	-0.19
	5.96	-0.19
	5.99	-0.19
	6.02	-0.21
	6.05	-0.19
	6.08	-0.19
	6.1	-0.2
	6.13	-0.19
	6.16	-0.18
	6.19	-0.18
	6.22	-0.18
	6.24	-0.19
	6.27	-0.19
	6.3	-0.18
	6.33	-0.2
	6.36	-0.18
	6.38	-0.18
	6.41	-0.19
	6.44	-0.19
	6.47	-0.18
	6.5	-0.19
	6.52	-0.17
	6.55	-0.19
	6.58	-0.18
	6.61	-0.18
	6.64	-0.18
	6.66	-0.18
	6.69	-0.18
	6.72	-0.18
	6.75	-0.18
	6.78	-0.17
	6.8	-0.16
	6.83	-0.18
	6.86	-0.18
	6.89	-0.16
	6.92	-0.18
	6.94	-0.18
	6.97	-0.17
	7	-0.18
	7.03	-0.18
	7.06	-0.18
	7.08	-0.17
	7.11	-0.19
	7.14	-0.19
	7.17	-0.18
	7.2	-0.17
	7.22	-0.17
	7.25	-0.17
	7.28	-0.18
	7.31	-0.19
	7.34	-0.19
	7.36	-0.16
	7.39	-0.17
	7.42	-0.16
	7.45	-0.18
	7.48	-0.17
	7.5	-0.15
	7.53	-0.15
	7.56	-0.14
	7.59	-0.14
	7.62	-0.12
	7.64	-0.09
	7.67	-0.08
	7.7	-0.06
	7.73	-0.01
	7.76	0.07
	7.78	0.2
	7.81	0.37
	7.84	0.71
	7.87	1.11
	7.9	1.85
	7.92	2.83
	7.95	4.21
	7.98	6.15
	8.01	8.42
	8.04	11.47
	8.06	14.88
	8.09	18.59
	8.12	22.99
	8.15	27.27
	8.18	32.08
	8.2	36.75
	8.23	41.34
	8.26	46.35
	8.29	50.59
	8.32	54.99
	8.34	58.96
	8.37	62.6
	8.4	66
	8.43	68.57
	8.46	70.83
	8.48	72.37
F1	8.51	73.4
	8.54	74.06
	8.57	74.28
	8.6	74.25
	8.62	74.04
	8.65	73.82
	8.68	73.66
	8.71	73.58
	8.74	73.63
	8.76	73.75
	8.79	73.94
	8.82	74.22
	8.85	74.51
	8.88	74.9
	8.9	75.3
	8.93	75.73
	8.96	76.22
	8.99	76.61
	9.02	77.06
	9.04	77.47
	9.07	77.92
	9.1	78.39
	9.13	78.75
	9.16	79.18
	9.18	79.57
	9.21	79.92
	9.24	80.28
	9.27	80.63
	9.3	80.98
	9.32	81.31
	9.35	81.6
	9.38	81.9
	9.41	82.16
	9.44	82.41
	9.46	82.63
F2	9.49	82.85
	9.52	83.08
	9.55	83.24
	9.58	83.38
	9.6	83.51
	9.63	83.63
	9.66	83.73
	9.69	83.84
	9.72	83.93
	9.74	83.99
	9.77	84
	9.8	84.03
	9.83	84.04
	9.86	84.07
	9.88	84.07
	9.91	84.04
	9.94	84.01
	9.97	83.95
	10	83.87
	10.02	83.81
	10.05	83.71
	10.08	83.65
	10.11	83.5
	10.14	83.38
	10.16	83.21
	10.19	83.09
	10.22	82.93
	10.25	82.81
	10.28	82.65
	10.3	82.49
	10.33	82.33
	10.36	82.16
	10.39	82.02
	10.42	81.86
	10.44	81.71
	10.47	81.55
	10.5	81.38
	10.53	81.25
	10.56	81.09
	10.58	80.94
	10.61	80.82
	10.64	80.74
	10.67	80.69
	10.7	80.62
	10.72	80.58
	10.75	80.62
	10.78	80.71
	10.81	80.85
	10.84	81.08
	10.86	81.36
	10.89	81.69
	10.92	82.16
	10.95	82.67
	10.98	83.35
	11	84.12
	11.03	84.96
	11.06	86.01
	11.09	87.09
	11.12	88.38
	11.14	89.77
	11.17	91.21
	11.2	92.96
	11.23	94.64
	11.26	96.48
	11.28	98.32
	11.31	100.17
F3	11.34	102.24
	11.37	104.1
	11.4	106.11
	11.42	108
	11.45	109.77
	11.48	111.56
	11.51	113.14
	11.54	114.71
	11.56	116.14
	11.59	117.29
	11.62	118.37
	11.65	119.17
	11.68	119.81
	11.7	120.21
	11.73	120.38
	11.76	120.38
	11.79	120.06
	11.82	119.54
	11.84	118.81
	11.87	117.93
	11.9	116.77
	11.93	115.59
	11.96	114.19
	11.98	112.7
	12.01	111.16
	12.04	109.35
	12.07	107.73
	12.1	105.88
	12.12	104.04
	12.15	102.21
	12.18	100.25
	12.21	98.45
	12.24	96.54
	12.26	94.69
	12.29	92.96
	12.32	91.1
	12.35	89.48
	12.38	87.8
	12.4	86.23
	12.43	84.83
	12.46	83.36
	12.49	82.09
	12.52	80.86
	12.54	79.67
	12.57	78.59
	12.6	77.52
	12.63	76.57
	12.66	75.62
	12.68	74.72
	12.71	73.91
	12.74	73.04
	12.77	72.33
	12.79	71.58
F4	12.82	70.84
	12.85	70.17
	12.88	69.47
	12.91	68.84
	12.93	68.17
	12.96	67.5
	12.99	66.89
	13.02	66.22
	13.05	65.6
	13.07	64.92
	13.1	64.21
	13.13	63.53
	13.16	62.73
	13.19	61.98
	13.21	61.12
	13.24	60.23
	13.27	59.27
	13.3	58.21
	13.33	57.17
	13.35	56.02
	13.38	54.82
	13.41	53.61
	13.44	52.24
	13.47	50.98
	13.49	49.57
	13.52	48.2
	13.55	46.9
	13.58	45.42
	13.61	44.16
	13.63	42.81
	13.66	41.47
	13.69	40.25
	13.72	38.96
	13.75	37.83
	13.77	36.62
	13.8	35.49
	13.83	34.43
	13.86	33.31
	13.89	32.35
	13.91	31.34
	13.94	30.41
	13.97	29.53
	14	28.58
	14.03	27.8
	14.05	26.98
	14.08	26.19
	14.11	25.47
	14.14	24.74
	14.17	24.07
	14.19	23.38
	14.22	22.76
	14.25	22.15
	14.28	21.54
	14.31	20.99
	14.33	20.41
	14.36	19.88
	14.39	19.37
	14.42	18.83
	14.45	18.36
	14.47	17.86
	14.5	17.39
	14.53	16.96
	14.56	16.49
	14.59	16.09
	14.61	15.67
	14.64	15.3
	14.67	14.95
	14.7	14.56
	14.73	14.25
	14.75	13.94
	14.78	13.65
	14.81	13.4
	14.84	13.12
	14.87	12.89
	14.89	12.65
	14.92	12.43
	14.95	12.19
	14.98	11.94
	15.01	11.74
	15.03	11.51
	15.06	11.27
	15.09	11.07
	15.12	10.81
	15.15	10.59
	15.17	10.34
	15.2	10.12
	15.23	9.9
	15.26	9.68
	15.29	9.44
	15.31	9.25
	15.34	9.04
	15.37	8.84
	15.4	8.67
	15.43	8.52
	15.45	8.35
	15.48	8.22
	15.51	8.08
	15.54	7.94
	15.57	7.85
	15.59	7.74
	15.62	7.64
	15.65	7.55
	15.68	7.47
	15.71	7.38
	15.73	7.3
	15.76	7.23
	15.79	7.16
	15.82	7.11
	15.85	7.05
	15.87	7.01
	15.9	6.97
	15.93	6.94
	15.96	6.93
	15.99	6.94
	16.01	6.98
	16.04	7.05
	16.07	7.15
	16.1	7.33
	16.13	7.51
	16.15	7.77
	16.18	8.05
	16.21	8.36
	16.24	8.74
	16.27	9.13
	16.29	9.53
	16.32	9.93
	16.35	10.31
	16.38	10.69
	16.41	11
	16.43	11.3
	16.46	11.56
	16.49	11.76
	16.52	11.94
	16.55	12.04
	16.57	12.13
	16.6	12.15
	16.63	12.14
	16.66	12.06
	16.69	11.96
	16.71	11.82
	16.74	11.64
	16.77	11.45
	16.8	11.22
	16.83	11.02
	16.85	10.8
	16.88	10.59
	16.91	10.41
	16.94	10.22
	16.97	10.07
	16.99	9.93
	17.02	9.8
	17.05	9.69
	17.08	9.57
	17.11	9.49
	17.13	9.4
	17.16	9.33
	17.19	9.27
	17.22	9.18
	17.25	9.11
	17.27	9.03
	17.3	8.96
	17.33	8.89
	17.36	8.87
	17.39	8.83
	17.41	8.79
	17.44	8.79
	17.47	8.78
	17.5	8.8
	17.53	8.84
	17.55	8.89
	17.58	8.95
	17.61	9.01
	17.64	9.08
	17.67	9.15
	17.69	9.25
	17.72	9.37
	17.75	9.46
	17.78	9.58
	17.81	9.7
	17.83	9.82
	17.86	9.94
	17.89	10.07
	17.92	10.18
	17.95	10.24
	17.97	10.28
	18	10.29
	18.03	10.26
	18.06	10.18
	18.09	10.09
	18.11	9.96
	18.14	9.83
	18.17	9.65
	18.2	9.47
	18.23	9.29
	18.25	9.08
	18.28	8.84
	18.31	8.62
	18.34	8.32
	18.37	8.07
	18.39	7.78
	18.42	7.46
	18.45	7.16
	18.48	6.83
	18.51	6.53
	18.53	6.22
	18.56	5.92
	18.59	5.67
	18.62	5.41
	18.65	5.2
	18.67	4.97
	18.7	4.77
	18.73	4.58
	18.76	4.41
	18.79	4.25
	18.81	4.09
	18.84	3.95
	18.87	3.8
	18.9	3.68
	18.93	3.56
	18.95	3.46
	18.98	3.34
	19.01	3.25
	19.04	3.18
	19.07	3.13
	19.09	3.05
	19.12	3.03
	19.15	3.02
	19.18	2.98
	19.21	3
	19.23	2.98
	19.26	3
	19.29	3.03
	19.32	3.05
	19.35	3.08
	19.37	3.11
	19.4	3.12
	19.43	3.15
	19.46	3.14
	19.49	3.15
	19.51	3.14
	19.54	3.12
	19.57	3.09
	19.6	3.04
	19.63	2.99
	19.65	2.95
	19.68	2.91
	19.71	2.83
	19.74	2.81
	19.77	2.77
	19.79	2.71
	19.82	2.67
	19.85	2.64
	19.88	2.58
	19.91	2.57
	19.93	2.55
	19.96	2.53
	19.99	2.52
	20.02	2.47
	20.05	2.45
	20.07	2.42
	20.1	2.41
	20.13	2.37
	20.16	2.34
	20.19	2.31
	20.21	2.28
	20.24	2.25
	20.27	2.21
	20.3	2.17
	20.33	2.13
	20.35	2.11
	20.38	2.08
	20.41	2.07
	20.44	2.06
	20.47	2.04
	20.49	2.06
	20.52	2.05
	20.55	2.04
	20.58	2.06
	20.61	2.08
	20.63	2.08
	20.66	2.08
	20.69	2.09
	20.72	2.09
	20.75	2.06
	20.77	2.05
	20.8	2.03
	20.83	2.01
	20.86	1.98
	20.89	1.95
	20.91	1.93
	20.94	1.88
	20.97	1.84
	21	1.82
	21.03	1.79
	21.05	1.77
	21.08	1.76
	21.11	1.77
	21.14	1.78
	21.17	1.78
	21.19	1.81
	21.22	1.82
	21.25	1.85
	21.28	1.89
	21.31	1.92
	21.33	1.96
	21.36	1.99
	21.39	2.02
	21.42	2.03
	21.45	2.06
	21.47	2.06
	21.5	2.09
	21.53	2.15
	21.56	2.21
	21.59	2.3
	21.61	2.37
	21.64	2.42
	21.67	2.48
	21.7	2.55
	21.73	2.61
	21.75	2.67
	21.78	2.75
	21.81	2.8
	21.84	2.85
	21.87	2.88
	21.89	2.9
	21.92	2.93
	21.95	2.93
	21.98	2.93
	22.01	2.94
	22.03	2.92
	22.06	2.91
	22.09	2.9
	22.12	2.9
	22.15	2.87
	22.17	2.89
	22.2	2.87
	22.23	2.88
	22.26	2.89
	22.29	2.91
	22.31	2.93
	22.34	2.96
	22.37	2.97
	22.4	3.02
	22.43	3.09
	22.45	3.19
	22.48	3.35
