# Supplementary material for: Membrane-anchored HDCR nanowires drive hydrogen-powered CO2 fixation
Source: Springer Nature journal article supplement (doi:10.1038/s41586-022-04971-z), 2022-07-20
Supplement: MOESM8 [file 41586_2022_4971_MOESM8_ESM.xlsx]

## Sheet: Extended Data Fig. 6b
HDCR activity in purified proteins of native HDCR (purified from wild type T. kivui strain) and HDCR_His (purified from T. kivui HDCR overproduction strain). Data for native HDCR is reproduced from Schwarz et al. (2018; doi: 10.1186/s13068-018-1236-3 ). Mean value for HDCR_His was calculated from n=9 values generated in 3 biological replicates with 3 technical replicates, respectively.
	Formate production from H2 + CO2 [µmol min-1 mg-1]						H2 production from formate [µmol min-1 mg-1]
	Biological Replicate ↓	Technical Replicate ↓	HDCR native	HDCR_His			Biological Replicate ↓	Technical Replicate ↓	HDCR native	HDCR_His
	1	1	747.45	713.22			1	1	406.11	1073.8
		2		713.22				2		1186.4
		3		623.08				3		1212.6
	2	1	1049.45	946.18			2	1	499.01	1556
		2		687.02				2		1204.8
		3		992.14				3		1378.7
	3	1		935.96			3	1		1248
		2		727.63				2		1308.7
		3		1098.9				3		1286
		Average	898.45	826.372				Average	452.56	1272.78

## Sheet: Extended Data Fig. 6c
HDCR activity in cytoplasmic fractions for native HDCR (extracted from wild type T. kivui strain) and HDCR_His (extracted from T. kivui HDCR overproduction strain), calculated from n=9 values generated in 3 biological replicates, each with 3 technical replicates.
	H2 production from formate [%]
	Biological Replicate ↓	Technical Replicate ↓	HDCR native	HDCR_His
	Exp. 1	1	1.57	67.31
		2	1.38	61.57
		3	1.97	63.46
	Exp. 2	1	1.35	60.95
		2	9.19	76.15
		3	9.14	62.64
	Exp. 3	1	8.54	54.85
		2	6.58	105.61
		3	5.29	122.28
		Average	5.00111	74.98
