# Supplementary material for: Membrane-anchored HDCR nanowires drive hydrogen-powered CO2 fixation
Source: Springer Nature journal article supplement (doi:10.1038/s41586-022-04971-z), 2022-07-20
Supplement: MOESM9 [file 41586_2022_4971_MOESM9_ESM.xlsx]

## Sheet: Extended Data Fig. 7a
Temperature- dependent hydrogenase activity in purified proteins of native HDCR (purified from WT T. kivui) and HDCR_His (purified from T. kivui HDCR overproduction strain), using methylviologen (MV) as electron acceptor. Data for native HDCR is reproduced from Schwarz et al. (2018; doi: 10.1186/s13068-018-1236-3 ). Mean value for HDCR_His was calculated from n=6 values, generated in 3 biological…
native HDCR
		H2:MV-oxidoreductase activity [%]
	Temperature [°C]→	30	40	50	60	70	80
Biological replicate →	1	44.0495	52.0866	78.6708	100.618	102.782	19.9382
	2	42.813	47.7589	82.5348	95.3632	97.2179	16.6924
	Average	43.4312	49.9227	80.6028	97.9907	100	18.3153
		Data reproduced from Schwarz et al. (2018), doi: 10.1186/s13068-018-1236-3
HDCR_His
		H2:MV-oxidoreductase activity [%]
	Temperature [°C]→	30	40	50	60	70	80
Biological replicate ↓	Technical replicate ↓
1	a	41.9084	62.8803	74.9407	93.4194	131.048	14.2341
	b	34.4072	55.2011	61.1172	86.9618	91.1509	11.6536
2	a	15.4106	11.0155	28.1012	61.4751	81.4514	3.5453
	b	14.6931	9.9881	42.8954	51.6541	89.437	2.8488
3	a	59.352	65.7802	95.1247	91.6614	120.827	12.6704
	b	40.2499	54.6537	69.6189	82.3735	86.0859	4.2703
	Average	49.801	60.2169	82.3718	87.0174	103.456	8.47035

## Sheet: Extended Data Fig. 7b
Temperature- dependent formate dehydrogenase activity in purified proteins of native HDCR (purified from WT T. kivui) and HDCR_His (purified from T. kivui HDCR overproduction strain), using methylviologen (MV) as electron acceptor. Data for native HDCR is reproduced from Schwarz et al. (2018; doi: 10.1186/s13068-018-1236-3 ). Mean value for HDCR_His was calculated from n=6 values, generated in 3 …
native HDCR
		Formate:MV-oxidoreductase activity [%]
	Temperature [°C]→	30	40	50	60	70	80
Biological replicate →	1	11.4392	28.5237	51.3278	72.0148	106.11	3.19406
	2	12.9248	27.1866	36.026	64.5497	93.8904	3.00836
	Average	12.182	27.8552	43.6769	68.2823	100	3.10121
		Data reproduced from Schwarz et al. (2018), doi: 10.1186/s13068-018-1236-3
HDCR_His
		Formate:MV-oxidoreductase activity [%]
	Temperature [°C]→	30	40	50	60	70	80
Biological replicate ↓	Technical replicate ↓
1	a	10.3035	22.5074	41.7595	96.3576	97.2365	0.7599
	b	11.7582	21.7389	52.0723	91.0637	128.258	0.0679
2	a	8.1486	10.5745	14.0537	67.6764	67.3468	9.0765
	b	6.5132	10.8335	13.4722	61.8337	73.6304	3.8104
3	a	14.6131	29.041	76.4232	101.331	130.366	7.9108
	b	15.8097	27.2679	63.3987	98.9601	103.162	3.0721
	Average	11.191	20.3272	43.5299	86.2037	100	4.11627

## Sheet: Extended Data Fig. 7c
pH- dependent hydrogenase activity in purified proteins of native HDCR (purified from WT T. kivui) and HDCR_His (purified from T. kivui HDCR overproduction strain), using methylviologen (MV) as electron acceptor. Data for native HDCR is reproduced from Schwarz et al. (2018; doi: 10.1186/s13068-018-1236-3 ). Mean value for HDCR_His was calculated from n=6 values, generated in 3 biological replicat…
native HDCR
		H2:MV-oxidoreductase activity [%]
	pH →	6.0	6.5	7.0	7.5	8.0	8.5	9.0
Biological replicate →	1	7.83641	9.39314	28.8918	76.2533	111.609	74.8021	71.1082
	2	10.4617	20.1583	60.4222	63.1926	88.3905	43.2718	45.6464
	Average	9.14908	14.7757	44.657	69.723	100	59.0369	58.3773
		Data reproduced from Schwarz et al. (2018), doi: 10.1186/s13068-018-1236-3
HDCR_His
		H2:MV-oxidoreductase activity [%]
	pH →	6.0	6.5	7.0	7.5	8.0	8.5	9.0	9.5
Biological replicate ↓	Technical replicate ↓
1	a	3.3528	9.4092	15.8787	63.6833	80.4049	34.9099	21.9836	20.9784
	b	3.8543	19.0354	9.1247	50.9319	67.7926	35.1417	22.8118	13.2846
2	a	15.4292	17.5393	28.9885	39.0026	121.512	84.1574	83.6977	48.4225
	b	4.0173	17.181	30.6078	43.7633	93.7533	87.8123	53.2308	39.3008
3	a	11.1766	23.9179	50.863	78.92	118.55	124.357	108.586	84.2216
	b	9.1987	18.7792	48.6098	42.8744	117.987	105.853	92.4606	78.9494
	Average	7.83815	17.6437	30.6787	53.1959	100	78.7052	63.7951	47.5262

## Sheet: Extended Data Fig. 7d
pH- dependent formate dehydrogenase activity in purified proteins of native HDCR (purified from WT T. kivui) and HDCR_His (purified from T. kivui HDCR overproduction strain), using methylviologen (MV) as electron acceptor. Data for native HDCR is reproduced from Schwarz et al. (2018; doi: 10.1186/s13068-018-1236-3 ). Mean value for HDCR_His was calculated from n=6 values, generated in 3 biologica…
native HDCR
		Formate:MV-oxidoreductase activity [%]
	pH →	6.0	6.5	7.0	7.5	8.0	8.5	9.0
Biological replicate →	1	27.9635	36.3526	112.705	59.2097	58.2371	32.9483	18.845
	2	21.8845	36.8389	87.2948	57.9939	56.6565	37.9331	18.6018
	Average	24.924	36.5957	100	58.6018	57.4468	35.4407	18.7234
		Data reproduced from Schwarz et al. (2018), doi: 10.1186/s13068-018-1236-3
HDCR_His
		Formate:MV-oxidoreductase activity [%]
	pH →	6.0	6.5	7.0	7.5	8.0	8.5	9.0	9.5
Biological replicate ↓	Technical replicate ↓
1	a	15.1862	39.7679	94.5394	101.161	92.8634	55.7846	29.5945	5.8734
	b	19.4887	38.5672	135.973	98.8393	91.7102	54.3613	28.5114	8.8951
2	a	27.4613	53.6594	85.4066	112.07	39.8215	26.7158	16.4029	6.4362
	b	24.111	51.8786	82.6061	87.9296	39.3072	27.8318	15.372	7.1595
3	a	38.1603	66.782	96.2811	75.8878	68.1409	77.6558	50.697	28.4111
	b	40.3377	48.407	94.943	124.112	52.2447	72.7442	52.3266	28.1286
	Average	27.4575	49.8437	98.2916	100	64.0147	52.5156	32.1507	14.1506

## Sheet: Extended Data Fig. 7e
Hydrogenase activity of different purified HDCR variants, using methylviologen (MV) as electron acceptor. Mean value for HDCR_His was calculated from n=9 measurements (3 biological replicates, each with 3 technical replicates).
Biological replicate ↓	Technical replicate ↓	H2:MV-oxidoreductase activity [%]
		HDCR_His	HDCR∆HycB4	HDCR∆HycB3	HDCR∆HydA2	HDCR_HycB3∆C	HDCR_HycB4∆C	HDCR_HycB4∆[4Fe4S]IV	HDCR_HydA2 C387A
1	1	83.0397	104.348	44.9771	0	92.6202	116.056	101.656	0
	2	97.0015	85.5994	71.571	0.365667	91.4933	99.3983	74.5961	0
	3	98.8299	75.1612	88.9569	0	106.712	73.4792	89.0566	0
2	1	79.1171	29.5725	98.7401	0	152.772	85.9152	89.0566	0
	2	62.3296	95.007	72.8309	0	112.09	63.2371	55.7476	0
	3	95.2397	45.7117	63.9951	0	141.826	158.374	48.4343	0
3	1	94.4984	29.6456	131.235	0	153.647	121.192	41.2207	0
	2	161.725	35.8719	91.2373	0	144.319	105.03	121.641	0
	3	128.22	40.865	94.997	0	121.927	124.742	89.5885	0
	Average	100	60.1981	84.2822	0.0406297	124.156	105.269	78.9996	0
		Mean value for HDCR_His from n=9 values was calculated and set to 100 % relative activity, respectively. Relative activities of other Samples have been calculated accordingly. Raw data of catalytic activities used for calculating relative activities are displayed below.
Biological replicate ↓	Technical replicate ↓	H2:MV-oxidoreductase activity [µmol min-1 mg-1]
		HDCR_His	HDCR∆HycB4	HDCR∆HycB3	HDCR∆HydA2	HDCR_HycB3∆C	HDCR_HycB4∆C	HDCR_HycB4∆[4Fe4S]IV	HDCR_HydA2 C387A
1	1	249.8	313.9	135.3	0	278.62	349.12	305.8	0
	2	291.8	257.5	215.3	1.1	275.23	299.01	224.4	0
	3	297.3	226.1	267.6	0	321.01	221.04	267.9	0
2	1	238	88.96	297.03	0	459.57	258.45	267.9	0
	2	187.5	285.8	219.09	0	337.19	190.23	167.7	0
	3	286.5	137.51	192.51	0	426.64	476.42	145.7	0
3	1	284.27	89.18	394.78	0	462.2	364.57	124	0
	2	487	107.91	274.46	0	434.14	315.95	366	0
	3	386	122.93	285.77	0	366.78	375.25	270	0
	Average	300.908	181.088	253.538	0.122222	373.487	316.671	237.711	0

## Sheet: Extended Data Fig. 7f
Formate dehydrogenase activity of different purified HDCR variants, using methylviologen (MV) as electron acceptor. Mean value for HDCR_His was calculated from n=9 measurements (3 biological replicates, each with 3 technical replicates).
Biological replicate ↓	Technical replicate ↓	Formate:MV-oxidoreductase activity [%]
		HDCR_His	HDCR∆HycB4	HDCR∆HycB3	HDCR∆HydA2	HDCR_HycB3∆C	HDCR_HycB4∆C	HDCR_HycB4∆[4Fe4S]IV	HDCR_HydA2 C387A
1	1	73.95	21.06	0	32.84	38.61	44.8	69.44	19.3
	2	60.42	20.06	0.05	30.58	39.16	56.03	62.17	34.34
	3	52.14	21.81	0	0	45.35	54.25	147.66	30.33
2	1	75.33	152.97	0	93.68	108.57	168.66	145.9	114.64
	2	37.88	136.73	0	89.17	115.42	124.32	125.6	107.8
	3	166.61	135.4	0.1	94.66	112.99	145.83	69.59	121.16
3	1	162.95	120.73	0	99.22	88.24	133.37	76.21	128.8
	2	133.47	129.96	0.15	98.55	93.21	122.36	62.75	118.63
	3	137.25	125.72	0	99.37	76.61	153.6	67.59	122.39
	Average	100	96.0489	0.0333333	70.8967	79.7956	111.469	91.8789	88.5989
		Mean value for HDCR_His from n=9 values was calculated and set to 100 % relative activity, respectively. Relative activities of other Samples have been calculated accordingly. Raw data of catalytic activities used for calculating relative activities are displayed below.
Biological replicate ↓	Technical replicate ↓	Formate:MV-oxidoreductase activity [µmol min-1 mg-1]
		HDCR_His	HDCR∆HycB4	HDCR∆HycB3	HDCR∆HydA2	HDCR_HycB3∆C	HDCR_HycB4∆C	HDCR_HycB4∆[4Fe4S]IV	HDCR_HydA2 C387A
1	1	29.5	8.4	0	13.1	15.4	17.87	7.7	27.7
	2	24.1	8	0.02	12.2	15.62	22.35	13.7	24.8
	3	20.8	8.7	0	0	18.09	21.64	12.1	58.9
2	1	30.05	61.02	0	37.37	43.31	67.28	45.73	58.2
	2	15.11	54.54	0	35.57	46.04	49.59	43	50.1
	3	66.46	54.01	0.04	37.76	45.07	58.17	48.33	27.76
3	1	65	48.16	0	39.58	35.2	53.2	51.38	30
	2	53.24	51.841	0.06	39.31	37.18	48.81	47.32	25
	3	54.75	50.15	0	39.64	30.56	61.27	48.82	27
	Average	39.89	38.3134	0.0133333	28.2811	31.83	44.4644	35.3422	36.6067

## Sheet: Extended Data Fig. 7g
H2 - production rates from formate in cytoplasmic fractions extracted from different HDCR variant strains. Enzymatic activity was calculated from n=9 measurements (3 biological replicates with 3 technical replicates, respectively).
		H2 production from formate [%]
Biological Replicate ↓	Technical Replicate ↓	HDCR_His	HDCR_HycB3∆C	HDCR_HycB4∆C	HDCR_HycB4∆ [4Fe4S] IV
1	1	67.2099	17.8777	0.808724	6.77613
	2	129.408	14.7653	0.637177	6.73937
2	1	149.835	8.77343	0.919005	4.61953
	2	93.3097	14.9246	0.588163	1.13957
3	1	82.4776	48.7195	2.87955	7.82992
	2	77.7601	43.3525	2.02181	7.46232
	Average	100	24.7355	1.30907	5.76114
Mean value for HDCR_His from n=6 values was calculated and set to 100 % relative activity, respectively. Relative activities of other Samples have been calculated accordingly. Raw data of catalytic activities used for calculating relative activities are displayed below.
		H2 production from formate [µmol min-1 mg-1]
Biological Replicate ↓	Technical Replicate ↓	HDCR_His	HDCR_HycB3∆C	HDCR_HycB4∆C	HDCR_HycB4∆ [4Fe4S] IV
1	1	62.64	14.59	0.66	5.53
	2	105.61	12.05	0.52	5.5
2	1	122.28	7.16	0.75	3.77
	2	76.15	12.18	0.48	0.93
3	1	67.31	39.76	2.35	6.39
	2	63.46	35.38	1.65	6.09
	Average	82.9083	20.1867	1.06833	4.70167

## Sheet: Extended Data Fig. 7h
Formate production rates from H2 + CO2 in cytoplasmic fractions extracted from different HDCR variant strains. Enzymatic activity was calculated from n=9 measurements (3 biological replicates with 3 technical replicates, respectively).
		Formate production from H2 + CO2 [%]
	Technical Replicate ↓	HDCR_His	HDCR_HycB3∆C	HDCR_HycB4∆C	HDCR_HycB4∆ [4Fe4S] IV
	1	111.919	14.3589	1.29432	34.0164
	2	104.84	8.21087	0.323581	34.8254
	3	83.2412	15.8555	2.99312	38.2634
	Average	100	12.8084	1.53701	35.7018
Mean value for HDCR_His from n=3 values was calculated and set to 100 % relative activity, respectively. Relative activities of other Samples have been calculated accordingly. Raw data of catalytic activities used for calculating relative activities are displayed below.
		Formate production from H2 + CO2 [µmol min-1 mg-1]
	Technical Replicate ↓	HDCR_His	HDCR_HycB3∆C	HDCR_HycB4∆C	HDCR_HycB4∆ [4Fe4S] IV
	1	27.67	3.55	0.32	8.41
	2	25.92	2.03	0.08	8.61
	3	20.58	3.92	0.74	9.46
	Average	24.7233	3.16667	0.38	8.82667
